# Supplementary material for: Supracluster assembly of an Al4 precursor toward the study of enhanced optical properties
Source: Royal Society of Chemistry journal article supplement (doi:10.1039/d4qi01103a), 2024-01-01
Supplement: d4qi01103a1.pdf [file d4qi01103a1.pdf]

## Supporting Information

### Supracluster Assembly of Al<sub>4</sub> Precursor toward Enhanced Optical Property Study

Fan Yang,<sup>‡a,b</sup> Rui-Yan Chen,<sup>‡a,c</sup> San-Tai Wang,<sup>a,b</sup> Yan-Ping He<sup>a,\*</sup>, Wei-Hui Fang<sup>a,b\*</sup> and Jian Zhang<sup>a</sup>

<sup>a</sup> State Key Laboratory of Structural Chemistry, Fujian Institute of Research on the Structure of Matter, Chinese Academy of Sciences, Fuzhou, Fujian 350002, P. R. China. E-mail: hyp041@163.com, and fwh@fjirsm.ac.cn

<sup>b</sup> University of Chinese Academy of Sciences, Beijing 100049, P. R. China

<sup>c</sup> MOE Key Laboratory of Cluster Science, School of Chemistry and Chemical Engineering, Beijing Institute of Technology, Beijing 100081, China

<sup>‡</sup> These authors contributed equally to this work.

### Table of Content

|                                                                                                                             |     |
|-----------------------------------------------------------------------------------------------------------------------------|-----|
| 1. Experimental Section.....                                                                                                | S2  |
| Table S1. Crystallographic Data and Structure Refinement Details for Compounds AIOC-168 to AIOC-176.....                    | S8  |
| 2. The detailed structure information of AIOC-168 to AIOC-176.....                                                          | S11 |
| 3. PXRD analyses of AIOC-168 to AIOC-176.....                                                                               | S19 |
| 4. The TGA curves of AIOC-168 to AIOC-176.....                                                                              | S23 |
| 5. The UV/Vis absorption spectra of Al <sub>4</sub> precursor and compounds AIOC-168 to AIOC-176.<br>.....                  | S27 |
| 6. The EDS spectra of AIOC-168 to AIOC-176.....                                                                             | S31 |
| 7. The Fluorescence Property.....                                                                                           | S33 |
| 8. CD spectra.....                                                                                                          | S34 |
| 9. IR spectrum.....                                                                                                         | S35 |
| 10. The NLO Property.....                                                                                                   | S36 |
| Table S5. The third-order nonlinear optical parameters of compounds Al <sub>4</sub> precursor and AIOC-168 to AIOC-176..... | S39 |
| Table S6. The comparison of the nonlinear absorption coefficients between this work and other work.....                     | S39 |

## 1. Experimental Section.

**Chemicals and Materials.** All the reagents and solvents employed are purchased commercially and used as received without further purification.  $\text{Al}(\text{O}^i\text{Pr})_3$ , 2,3-dihydroxybenzoic ( $\text{H}_3\text{L}$ ), pyrazole, silver perchlorate ( $\text{AgClO}_4$ ), (R)-2,2'-bis(diphenylphosphino)-1,1'-binaphthyl (R-binap), (S)-2,2'-bis(diphenylphosphino)-1,1'-binaphthyl (S-binap) were acquired from Aladdin Chemical Reagent Shaihai. N,N-Dimethylformamide (DMF), ethanol ( $\geq 99.5\%$ ), formamide ( $\text{CH}_3\text{ON}$ ), ammonium hydroxide, iron (II) sulfate heptahydrate ( $\text{FeSO}_4 \cdot 7\text{H}_2\text{O}$ ) were bought from Sinopharm Chemical Reagent Beijing. Copper(I) oxide ( $\text{Cu}_2\text{O}$ ), bis(diphenylphosphino)methane (bdpm), 1,3-bis(diphenylphosphino)propane (1,3-bdpp), 1,4-bis(diphenylphosphino)butane (1,4-bdpp), 1,5-bis(diphenylphosphino)pentane (1,5-bdpp), 2,9-dimethyl-4,7-diphenyl-1,10-phenanthroline (dmdpp), (oxydi-2,1-phenylene)bis(diphenylphosphine) (DPEphos), 1,10-phenanthroline monohydrate (phen), 3,4,7,8-tetramethyl-1,10-phenanthroline ( $\text{me}_4\text{phen}$ ) were purchased from Adamas-beta.

**Materials and Instrumentation.** The energy dispersive spectroscopy (EDS) analyses of single crystals were performed on a JEOL JSM6700F field-emission scanning electron microscope equipped with an Oxford INCA system. IR spectra (KBr pellets) were recorded on an ABB Bomem MB102 spectrometer over a range 400-3900  $\text{cm}^{-1}$ . Powder X-ray diffraction (PXRD) data were collected on a Rigaku Mini Flex II diffractometer using Ga  $\text{K}\alpha$  radiation ( $\lambda = 1.3405 \text{ \AA}$ ) under ambient conditions. The UV-vis diffuse reflection data were recorded at room temperature using a powder sample with  $\text{BaSO}_4$  as a standard (100% reflectance) on a PerkinElmer Lambda-950 UV spectrophotometer and scanned at 200-1200 nm. The absorption data were calculated from the Kubelka-Munk function,  $(F(R) = (1-R)^2/2R)$ , where R representing the reflectance. The TGA curves were recorded in the region of 20–800  $^\circ\text{C}$  using a heating rate of 10  $^\circ\text{C min}^{-1}$  in a flowing  $\text{N}_2$  atmosphere on a Mettler Toledo TGA/SDTA 851e analyser. The liquid CD spectra were measured on an MOS-450 spectropolarimeter using methyl alcohol and cuvet. The PL spectra were finished on the UV/V/NIR Fluorescence Spectrometer (Edinburgh, FLS1000).

**General methods for X-ray Crystallography.** Crystallographic data for compounds (**AIOC-168** to **AIOC-176**) were collected on Hybrid Pixel Array detector equipped with graphite-monochromated Ga K $\alpha$  radiation ( $\lambda = 1.3405 \text{ \AA}$ ). The structures were solved with direct methods using OLEX<sup>2</sup> and refined by full-matrix least-squares on F<sup>2</sup> using *SHELXTL*. Contributions to scattering due to disordered solvent molecules were removed using the *SQUEEZE* routine of *PLATON*. All hydrogen atoms were theoretical hydrogenation, riding on the concerned atoms and refined with fixed thermal factors. Non-hydrogen atoms were refined anisotropically.

### The synthesis of Al<sub>4</sub> precursor.

**The synthesis of (Me<sub>2</sub>NH<sub>2</sub>)<sub>4</sub>[Al<sub>4</sub>(L)<sub>4</sub>(Cat)<sub>2</sub>] (**AIOC-13**).** According to our previous work: *Inorg. Chem.* 2020, 59, 13760–13766. A mixture of Al(O<sup>*i*</sup>Pr)<sub>3</sub> (0.2 g, 0.98 mmol), 2,3-dihydroxybenzoic acid (H<sub>3</sub>L, 0.4 g, 2.60 mmol), pyrazole (2 g, 29.38 mmol), and DMF (5 mL) was sealed in a 25 mL Teflon reactor and transferred to a preheated oven at 160 °C for 3 days. When cooled to room temperature, light brown crystals of **AIOC-13** were obtained (yield: 75 % based on Al(O<sup>*i*</sup>Pr)<sub>3</sub>). Synthesis scale up is also possible, using the 25 mL Teflon reactor can obtain 0.27 g **AIOC-13**, and using the 50 mL Teflon reactor can obtain 0.68 g **AIOC-13**.

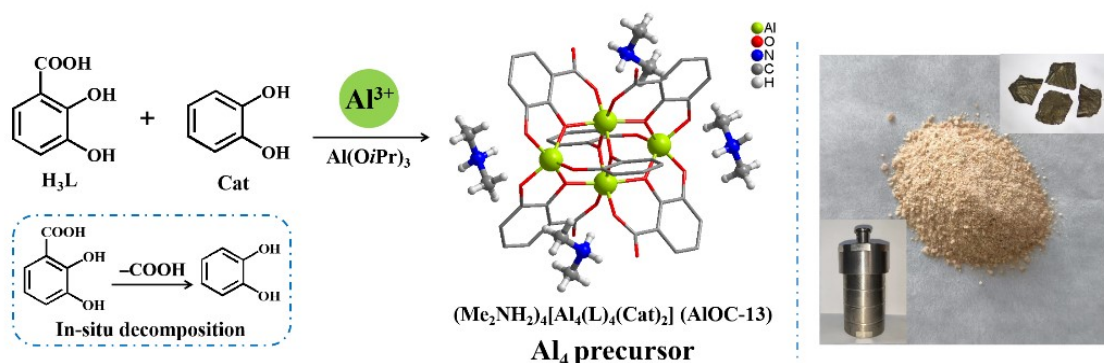

**Scheme S1.** The synthesis scheme of Al<sub>4</sub> precursor and its crystal and powder photos.

### Supracluster assembly structures via non-covalent bonds:

**Solvothermal synthesis of AIOC-168 (Me<sub>2</sub>NH<sub>2</sub>)<sub>3</sub>[Ag(1,3-bdpp)<sub>2</sub>][Al<sub>4</sub>(L)<sub>4</sub>(Cat)<sub>2</sub>·Guests.** In a 20 mL vial, Al<sub>4</sub> precursor (55 mg, 0.05 mmol) was dissolved in 2 mL of H<sub>2</sub>O at 100 °C for 6 h. The mixture of 2 mL precursor, silver perchlorate (AgClO<sub>4</sub>, 14 mg, 0.07 mmol), 1,3-bis(diphenylphosphino)propane (1,3-bdpp, 45 mg, 0.11 mmol), EtOH (2 mL), DMF (2 mL) was sealed in a 20 mL vial at 80 °C for 24 h. When cooled to room temperature, light brown crystals were obtained.

(yield: 75 % based on  $\text{Al}_4$  precursor). The crystals are rinsed with EtOH and preserved under a sealed and dry environment.

**Solvothermal synthesis of AIOC-169  $(\text{Me}_2\text{NH}_2)_3[\text{Ag}(\text{dmdpp})(\text{DPEphos})][\text{Al}_4(\text{L})_4(\text{Cat})_2] \cdot \text{Guests}$ .** In a 20 mL vial,  $\text{Al}_4$  precursor (55 mg, 0.05 mmol) was dissolved in 2 mL of  $\text{H}_2\text{O}$  at 100 °C for 6 h. The mixture of 2 mL precursor, silver perchlorate ( $\text{AgClO}_4$ , 9 mg, 0.04 mmol), 2,9-dimethyl-4,7-diphenyl-1,10-phenanthroline (dmdpp, 15 mg, 0.04 mmol), (oxydi-2,1-phenylene)bis(diphenylphosphine) (DPEphos, 22 mg, 0.04 mmol), EtOH (2 mL), DMF (2 mL) was sealed in a 20 mL vial at 80 °C for 24 h. When cooled to room temperature, light yellow crystals were obtained. (yield: 70 % based on precursor). The crystals are rinsed with EtOH and preserved under a sealed and dry environment.

**Solvothermal synthesis of AIOC-170(R)  $(\text{Me}_2\text{NH}_2)_6[\text{Ag}(\text{R-binap})_2][\text{Al}_4(\text{L})_4(\text{Cat})_2]_2 \cdot \text{Guests}$ .** In a 20 mL vial,  $\text{Al}_4$  precursor (55 mg, 0.05 mmol) was dissolved in 2 mL of  $\text{H}_2\text{O}$  at 100 °C for 6 h. The mixture of 2 mL precursor, silver perchlorate ( $\text{AgClO}_4$ , 30 mg, 0.15 mmol), (R)-2,2'-bis(diphenylphosphino)-1,1'-binaphthyl (R-binap, 97 mg, 0.16 mmol), EtOH (2 mL), DMF (2 mL) was sealed in a 20 mL vial at 80 °C for 24 h. When cooled to room temperature, colourless crystals were obtained. (yield: 35 % based on precursor). The crystals are rinsed with EtOH and preserved under a sealed and dry environment.

**Solvothermal synthesis of AIOC-170(S)  $(\text{Me}_2\text{NH}_2)_6[\text{Ag}(\text{S-binap})_2][\text{Al}_4(\text{L})_4(\text{Cat})_2]_2 \cdot \text{Guests}$ .** In a 20 mL vial,  $\text{Al}_4$  precursor (55 mg, 0.05 mmol) was dissolved in 2 mL of  $\text{H}_2\text{O}$  at 100 °C for 6 h. The mixture of 2 mL precursor, silver perchlorate ( $\text{AgClO}_4$ , 30 mg, 0.15 mmol), (S)-2,2'-bis(diphenylphosphino)-1,1'-binaphthyl (S-binap, 97 mg, 0.16 mmol), EtOH (2 mL), DMF (2mL) was sealed in a 20 mL vial at 80 °C for 24 h. When cooled to room temperature, colourless crystals were obtained. (yield: 35 % based on precursor). The crystals are rinsed with EtOH and preserved under a sealed and dry environment.

**Solvothermal synthesis of AIOC-171  $[\text{Fe}(\text{phen})_3]_2[\text{Al}_4(\text{L})_4(\text{Cat})_2] \cdot \text{Guests}$ .** In a 20 mL vial,  $\text{Al}_4$  precursor (55 mg, 0.05 mmol) was dissolved in 2 mL of  $\text{H}_2\text{O}$  at 100 °C for 6 h. The mixture of 2 mL precursor, iron (II) sulfate heptahydrate ( $\text{FeSO}_4 \cdot 7\text{H}_2\text{O}$ , 30 mg, 0.11 mmol), 1,10-phenanthroline monohydrate (phen, 30 mg, 0.15 mmol), DMF

(2 mL), ammonium hydroxide (5 drops) was sealed in a 20 mL vial at 80 °C for 24 h. When cooled to room temperature, deep red crystals were obtained. (yield: 70 % based on precursor). The crystals are rinsed with DMF and preserved under a sealed and dry environment.

#### **Solvothermal synthesis of AIOC-172 [Cu(Me<sub>4</sub>phen)<sub>2</sub>(H<sub>2</sub>O)]<sub>2</sub>[Al<sub>4</sub>(L)<sub>4</sub>(Cat)<sub>2</sub>]·Guests.**

In a 20 mL vial, Al<sub>4</sub> precursor (55 mg, 0.05 mmol) was dissolved in 2 mL of H<sub>2</sub>O at 100 °C for 6 h. The mixture of 2 mL precursor, copper(I) oxide (Cu<sub>2</sub>O, 7 mg, 0.05 mmol), 3,4,7,8-tetramethyl-1,10-phenanthroline (me<sub>4</sub>phen, 14 mg, 0.06 mmol), NMF (2 mL), ammonium hydroxide (5 drops) was sealed in a 20 mL vial at 80 °C for 24 h. When cooled to room temperature, grey crystals were obtained. (yield: 45 % based on precursor). The crystals are rinsed with DMF and preserved under a sealed and dry environment.

#### **Supracluster assembly structures via coordination bonds**

#### **Solvothermal synthesis of AIOC-173 [Ag<sub>2</sub>(bdpm)<sub>2</sub>][Al<sub>4</sub>(L)<sub>4</sub>(Cat)<sub>2</sub>]·Guests. In a 20**

**mL vial,** Al<sub>4</sub> precursor (55 mg, 0.05 mmol) was dissolved in 2 mL of H<sub>2</sub>O at 100 °C for 6 h. The mixture of 2 mL precursor, silver perchlorate (AgClO<sub>4</sub>, 34 mg, 0.16 mmol), bis(diphenylphosphino)methane (bdpm, 62 mg, 0.16 mmol), EtOH (2 mL), DMF (2 mL) was sealed in a 20 mL vial at 80 °C for 24 h. When cooled to room temperature, white crystals were obtained. (yield: 45 % based on precursor). The crystals are rinsed with EtOH and preserved under a sealed and dry environment.

#### **Solvothermal synthesis of AIOC-174 [Ag<sub>3</sub>(1,5-bdpp)<sub>3</sub>][Al<sub>4</sub>(L)<sub>4</sub>(Cat)<sub>2</sub>](ClO<sub>4</sub>)<sub>2</sub>·Guests. In a 20 mL vial,**

Al<sub>4</sub> precursor (55 mg, 0.05 mmol) was dissolved in 2 mL of H<sub>2</sub>O at 100 °C for 6 h. The mixture of 2 mL precursor, silver perchlorate (AgClO<sub>4</sub>, 51 mg, 0.25 mmol), 1,5-bis(diphenylphosphino)pentane (1,5-bdpp, 106 mg, 0.24 mmol), EtOH (2 mL), DMF (2 mL) was sealed in a 20 mL vial at 80 °C for 24 h. When cooled to room temperature, white crystals were obtained. (yield: 35 % based on precursor). The crystals are rinsed with EtOH and preserved under a sealed and dry environment.

#### **Solvothermal synthesis of AIOC-175 [Ag<sub>4</sub>(1,4-bdpp)<sub>3</sub>][Al<sub>4</sub>(L)<sub>4</sub>(Cat)<sub>2</sub>]·Guests.** In a 20 mL vial, Al<sub>4</sub> precursor (55 mg, 0.05 mmol) was dissolved in 2 mL of H<sub>2</sub>O at 100 °C for 6 h. The mixture of 2 mL precursor, silver perchlorate (AgClO<sub>4</sub>, 30 mg, 0.15 mmol),

1,4-bis(diphenylphosphino)butane (1,4-bdppb, 60 mg, 0.14 mmol), ethanol (2 mL), DMF (2 mL) was sealed in a 20 mL vial at 80 °C for 24 h. When cooled to room temperature, light brown crystals were obtained. (yield: 55 % based on precursor). The crystals are rinsed with EtOH and preserved under a sealed and dry environment.

**Solvothermal synthesis of AIOC-176 [Ag<sub>4</sub>(bdpm)<sub>2</sub>(1,4-bdppb)][Al<sub>4</sub>(L)<sub>4</sub>(Cat)<sub>2</sub>]-Guests.** In a 20 mL vial, Al<sub>4</sub> precursor (55 mg, 0.05 mmol) was dissolved in 2 mL of H<sub>2</sub>O at 100 °C for 6 h. The mixture of 2 mL precursor, silver perchlorate (AgClO<sub>4</sub>, 34 mg, 0.16 mmol), bis(diphenylphosphino)methane (bdpm, 31 mg, 0.08 mmol), 1,4-bis(diphenylphosphino)butane (1,4-bdppb, 34 mg, 0.08 mmol), EtOH (2 mL), DMF (2 mL) was sealed in a 20 mL vial at 80 °C for 24 h. When cooled to room temperature, light yellow crystals were obtained. (yield: 75 % based on precursor). The crystals are rinsed with EtOH and preserved under a sealed and dry environment.

#### **Fabrication of Al<sub>4</sub> precursor@PDMS and AIOCs@PDMS.**

Al<sub>4</sub> precursor@PDMS and AIOCs@PDMS were fabricated using Sylgard 184 (Dow Corning) by thoroughly mixing 10 parts base to 1 part curing agent. The coordinate crystals were mixed with the PDMS solution to form coordinates dispersed PDMS suspension. And then, the mixture suspension was added into a template and then put the template into a vacuum oven at 60 °C for 6 hours. Last, the transparent and flexible Al<sub>4</sub> precursor@PDMS and AIOCs@PDMS were obtained.

#### **Z-scan measurements.**

The third-order NLO properties of the sample were evaluated by using the Z-scan technique. The excitation light source was an Nd:YAG laser with a repetition rate of 5 Hz. The laser pulse (period, 5 ns; wavelength, 532 nm) was split into two beams with a mirror. The pulse energies at the front and back of the samples were monitored using energy detectors 1 and 2. All of the measurements were conducted at room temperature. The sample was mounted on a computer-controlled translation stage that shifted each sample along the z-axis.

#### **Calculation of the nonlinear optical parameters.**

The imaginary parts of the third-order susceptibility  $Im \chi^{(3)}$  was determined by the following equation:

$$Im \chi^{(3)}(esu) = \frac{c \left(\frac{m}{s}\right)^2 \beta \left(\frac{m}{W}\right) n_0^2}{240 \pi^2 \omega (s^{-1})}$$

Where  $\beta$  is the nonlinear absorption coefficient,  $c$  is the speed of light in vacuum,  $\omega$  is angular frequency of the incident wavelength and  $n_0$  is the linear refractive index, respectively.

The relationship of the transmittance and input laser intensity for a spatially Gaussian beam can be plotted from the open-aperture Z-scan curve. From the input laser pulse energy  $E_{in}$  and beam radius  $\omega(z)$ , the light fluence  $F_{in}(z)$  at any position can be obtained.  $F_{in}(z)$  is defined as:

$$F_{in}(z) = \frac{4E_{in}\sqrt{\ln 2}}{3 \pi^2 \omega(z)^2}$$

Where  $\omega(z)$  is defined as:

$$\omega(z) = \omega_0 \left[ 1 + \left( \frac{z}{z_0} \right)^2 \right]^{\frac{1}{2}}$$

where  $\omega_0$  and  $z_0$  are the light beam radius and the Rayleigh range, respectively, and  $z_0$  is defined as:

$$z_0 = \frac{k\omega_0^2}{2}$$

where  $k$  is defined as:

$$k = \frac{2\pi}{\lambda}$$

The curve of output fluence versus input fluence in Figure 3b was plotted from Figure 3c.

The equation fits for the nonlinear absorption coefficient  $\beta$  as follows:

$$T(Z, S = 1) = \frac{1}{\sqrt{\pi} q_0(Z, 0)} \int_{-\infty}^{\infty} \ln \left[ 1 + q_0(Z, 0) e^{(-r)^2} \right] dr$$

$$q_0(Z, 0) = \beta I_0 L_{eff}$$

$$L_{eff} = \frac{1 - e^{-\alpha l}}{\alpha}$$

In these equations,  $I_0$  is the on-axis peak intensity at the focus ( $Z=0$ ),  $L_{eff}$  is the effective thickness of the sample,  $\alpha$  is the linear absorption coefficient, and  $l$  is the sample thickness.



**Table S1.** Crystallographic Data and Structure Refinement Details for Compounds **AIOC-168** to **AIOC-170(S)**.

| compound                                                               | AIOC-168                           | AIOC-169                          | AIOC-170(R)                          | AIOC-170(S)                          |
|------------------------------------------------------------------------|------------------------------------|-----------------------------------|--------------------------------------|--------------------------------------|
| CCDC                                                                   | 2303391                            | 2303392                           | 2303393                              | 2303394                              |
| formula                                                                | $C_{100}H_{100}AgAl_4N_3O_{22}P_4$ | $C_{106}H_{85}AgAl_4N_4O_{21}P_2$ | $C_{266}H_{207}Ag_2Al_8N_3O_{44}P_8$ | $C_{267}H_{207}Ag_2Al_8N_5O_{39}P_8$ |
| formula weight                                                         | 2036.50                            | 2028.51                           | 4846.64                              | 4788.70                              |
| crystal system                                                         | Triclinic                          | Orthorhombic                      | Monoclinic                           | Monoclinic                           |
| space group                                                            | $P\bar{1}$                         | $Pbca$                            | $P2_1$                               | $P2_1$                               |
| <i>a</i> (Å)                                                           | 12.9543(2)                         | 22.2866(13)                       | 22.7099(4)                           | 22.7861(5)                           |
| <i>b</i> (Å)                                                           | 19.4350(3)                         | 22.3784(8)                        | 22.9468(4)                           | 23.1721(4)                           |
| <i>c</i> (Å)                                                           | 20.0165(3)                         | 43.3645(19)                       | 22.7802(4)                           | 23.0114(4)                           |
| $\alpha$ (°)                                                           | 95.8910(10)                        | 90                                | 90                                   | 90                                   |
| $\beta$ (°)                                                            | 93.4480(10)                        | 90                                | 93.312(2)                            | 93.565(2)                            |
| $\gamma$ (°)                                                           | 108.1350(10)                       | 90                                | 90                                   | 90                                   |
| <i>V</i> (Å <sup>3</sup> )                                             | 4741.21(13)                        | 21627.5(18)                       | 11851.4(4)                           | 12126.5(4)                           |
| <i>Z</i>                                                               | 2                                  | 8                                 | 2                                    | 2                                    |
| <i>D</i> <sub>calcd</sub> (g cm <sup>-3</sup> )                        | 1.427                              | 1.246                             | 1.358                                | 1.311                                |
| $\mu$ (Ga K $\alpha$ ) (mm <sup>-1</sup> )                             | 2.214                              | 1.761                             | 1.833                                | 1.776                                |
| <i>F</i> (000)                                                         | 2114.0                             | 8368.0                            | 5003.0                               | 4948.0                               |
| temperature (K)                                                        | 99.9(4)                            | 293(2)                            | 100.0(3)                             | 293.00(10)                           |
| theta min, max (deg)                                                   | 3.876, 120.204                     | 4.944, 85.238                     | 4.644, 85.038                        | 4.71, 105.856                        |
| GOF                                                                    | 1.051                              | 1.439                             | 1.023                                | 1.043                                |
| <i>R</i> (int)                                                         | 0.0482                             | 0.1286                            | 0.0733                               | 0.0453                               |
| observed data [( <i>I</i> > 2 $\sigma$ ( <i>I</i> )]                   | 20749                              | 10359                             | 18350                                | 24232                                |
| <i>R</i> <sub>1</sub> , <i>wR</i> <sub>2</sub> (all data) <sup>a</sup> | 0.0709, 0.1361                     | 0.1615, 0.3777                    | 0.0940, 0.2193                       | 0.0717, 0.1498                       |
| Min and max resd dens (e·Å <sup>-3</sup> )                             | -0.95, 1.11                        | -1.26, 2.73                       | -1.12, 1.86                          | -1.07, 0.56                          |
| Flack                                                                  | -----                              | -----                             | -0.022(8)                            | 0.005(7)                             |

**Table S2.** Crystallographic Data and Structure Refinement Details for Compounds **AIOC-171** to **AIOC-174**.

| compound                                                                  | <b>AIOC-171</b>                     | <b>AIOC-172</b>                     | <b>AIOC-173</b>                   | <b>AIOC-174</b>                             |
|---------------------------------------------------------------------------|-------------------------------------|-------------------------------------|-----------------------------------|---------------------------------------------|
| CCDC                                                                      | 2303395                             | 2303396                             | 2303397                           | 2303398                                     |
| formula                                                                   | $C_{112}H_{72}Al_4Fe_2N_{12}O_{22}$ | $C_{106}H_{94}Al_4Cu_2N_{10}O_{24}$ | $C_{140}H_{108}Ag_4Al_4O_{20}P_8$ | $C_{220}H_{214}Ag_6Al_4Cl_2N_2O_{30}P_{12}$ |
| weight                                                                    | 2157.43                             | 2126.91                             | 2897.42                           | 4563.60                                     |
| crystal system                                                            | Monoclinic                          | Triclinic                           | Triclinic                         | Triclinic                                   |
| space group                                                               | <i>I</i> 2/a                        | <i>P</i> -1                         | <i>P</i> -1                       | <i>P</i> -1                                 |
| <i>a</i> (Å)                                                              | 29.3776(9)                          | 12.5246(3)                          | 14.6487(3)                        | 17.2507(2)                                  |
| <i>b</i> (Å)                                                              | 11.8729(2)                          | 13.3926(4)                          | 15.1376(3)                        | 18.2402(3)                                  |
| <i>c</i> (Å)                                                              | 30.2151(9)                          | 15.6926(5)                          | 17.0263(3)                        | 19.1425(3)                                  |
| $\alpha$ (°)                                                              | 90                                  | 114.226(3)                          | 96.706(2)                         | 66.449(2)                                   |
| $\beta$ (°)                                                               | 117.862(4)                          | 91.865(2)                           | 112.108(2)                        | 72.9580(10)                                 |
| $\gamma$ (°)                                                              | 90                                  | 100.748(2)                          | 98.931(2)                         | 69.9380(10)                                 |
| <i>V</i> (Å <sup>3</sup> )                                                | 9317.2(5)                           | 2340.77(13)                         | 3391.61(12)                       | 5100.72(15)                                 |
| <i>Z</i>                                                                  | 4                                   | 1                                   | 1                                 | 1                                           |
| <i>D</i> <sub>calcd</sub> (g cm <sup>-3</sup> )                           | 1.538                               | 1.509                               | 1.419                             | 1.486                                       |
| $\mu$ (Ga Ka)<br>(mm <sup>-1</sup> )                                      | 2.435                               | 3.143                               | 4.132                             | 4.241                                       |
| <i>F</i> (000)                                                            | 4432.0                              | 1102.0                              | 1468.0                            | 2336.0                                      |
| temperature<br>(K)                                                        | 293(2)                              | 100.00(10)                          | 100.00(10)                        | 100.00(10)                                  |
| theta min,<br>max (deg)                                                   | 5.752, 85.284                       | 5.41, 107.702                       | 4.962, 107.708                    | 4.756, 107.71                               |
| GOF                                                                       | 1.051                               | 1.020                               | 0.917                             | 1.008                                       |
| <i>R</i> (int)                                                            | 0.0283                              | 0.0624                              | 0.0711                            | 0.0656                                      |
| observed data<br>[[ <i>I</i> > 2σ( <i>I</i> )]                            | 4937                                | 8510                                | 12066                             | 18515                                       |
| <i>R</i> <sub>1</sub> , <i>wR</i> <sub>2</sub> (all<br>data) <sup>a</sup> | 0.0481, 0.1079                      | 0.0596, 0.1402                      | 0.0635, 0.1709                    | 0.0473, 0.1161                              |
| Min and max<br>resd dens<br>(e·Å <sup>-3</sup> )                          | -0.28, 0.25                         | -0.72, 0.92                         | -1.75, 1.75                       | -1.20, 2.01                                 |

**Table S3.** Crystallographic Data and Structure Refinement Details for Compounds **AIOC-175** to **AIOC-176**.

| compound                                                               | <b>AIOC-175</b>                                                                                | <b>AIOC-176</b>                                                                                 |
|------------------------------------------------------------------------|------------------------------------------------------------------------------------------------|-------------------------------------------------------------------------------------------------|
| CCDC                                                                   | 2303398                                                                                        | 2303400                                                                                         |
| formula                                                                | C <sub>62</sub> H <sub>52</sub> Ag <sub>2</sub> Al <sub>2</sub> O <sub>10</sub> P <sub>3</sub> | C <sub>61</sub> H <sub>54</sub> Ag <sub>2</sub> Al <sub>2</sub> NO <sub>10</sub> P <sub>3</sub> |
| formula weight                                                         | 1319.64                                                                                        | 1323.66                                                                                         |
| crystal system                                                         | Monoclinic                                                                                     | Triclinic                                                                                       |
| space group                                                            | <i>I</i> 2/a                                                                                   | <i>P</i> -1                                                                                     |
| <i>a</i> (Å)                                                           | 19.0898(2)                                                                                     | 13.99610(10)                                                                                    |
| <i>b</i> (Å)                                                           | 19.1937(2)                                                                                     | 15.35070(10)                                                                                    |
| <i>c</i> (Å)                                                           | 30.3739(2)                                                                                     | 15.96420(10)                                                                                    |
| $\alpha$ (°)                                                           | 90                                                                                             | 113.0180(10)                                                                                    |
| $\beta$ (°)                                                            | 93.8530(10)                                                                                    | 91.0680(10)                                                                                     |
| $\gamma$ (°)                                                           | 90                                                                                             | 114.7720(10)                                                                                    |
| <i>V</i> (Å <sup>3</sup> )                                             | 11103.96(18)                                                                                   | 2797.17(4)                                                                                      |
| <i>Z</i>                                                               | 8                                                                                              | 2                                                                                               |
| <i>D</i> <sub>calcd</sub> (g cm <sup>-3</sup> )                        | 1.579                                                                                          | 1.572                                                                                           |
| $\mu$ (Ga Ka) (mm <sup>-1</sup> )                                      | 4.918                                                                                          | 4.885                                                                                           |
| <i>F</i> (000)                                                         | 5352.0                                                                                         | 1344.0                                                                                          |
| temperature (K)                                                        | 100.0(2)                                                                                       | 100.0(2)                                                                                        |
| theta min, max (deg)                                                   | 5.07, 120.534                                                                                  | 5.358, 120.46                                                                                   |
| GOF                                                                    | 1.026                                                                                          | 1.065                                                                                           |
| <i>R</i> (int)                                                         | 0.0330                                                                                         | 0.0309                                                                                          |
| observed data [ <i>I</i> > 2 $\sigma$ ( <i>I</i> )]                    | 12352                                                                                          | 12467                                                                                           |
| <i>R</i> <sub>1</sub> , <i>wR</i> <sub>2</sub> (all data) <sup>a</sup> | 0.0401, 0.0994                                                                                 | 0.0492, 0.1056                                                                                  |
| Min and max resd dens (e·Å <sup>-3</sup> )                             | -0.75, 0.28                                                                                    | -1.65, 1.70                                                                                     |

## 2. The detailed structure information of AIOC-168 to AIOC-176.

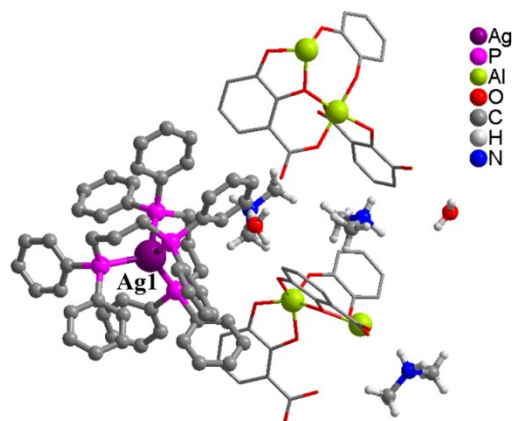

**Figure S1.** The asymmetric unit of **AIOC-168**, showing one  $\text{Al}_4$  cluster, one  $[\text{Ag}(1,3\text{-bdpp})_2]^+$  unit and three  $(\text{Me}_2\text{NH}_2)^+$  cations, and two  $\text{H}_2\text{O}$  molecules (Other solvents could not be located because of high disorder).

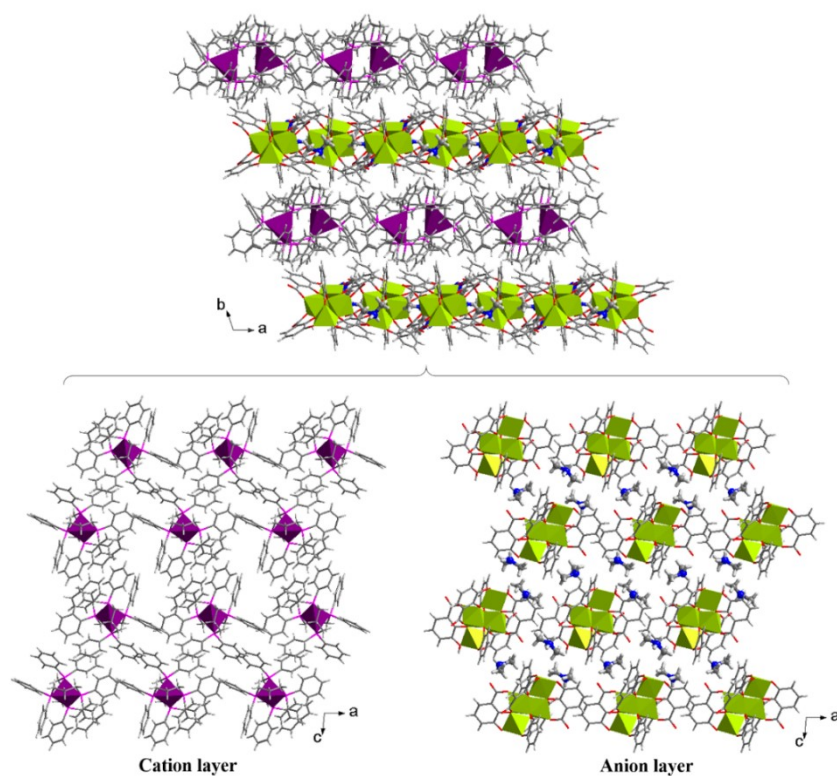

**Figure S2.** The packed structure along the  $c$ -axis composed of a cationic  $[\text{Ag}(1,3\text{-bdpp})_2]^+$  layer and an anionic  $\text{Al}_4$  layer in **AIOC-168**, in which the  $(\text{Me}_2\text{NH}_2)^+$  counteranions are located in the anion layer.

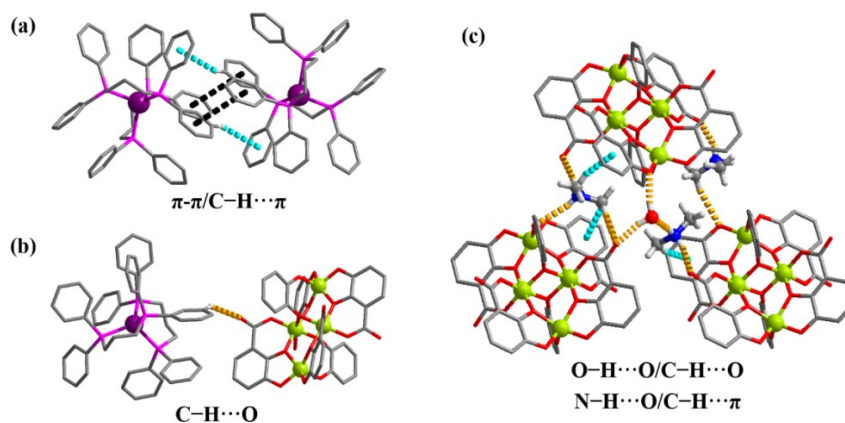

**Figure S3.** The supramolecular interactions in **AIOC-168**.

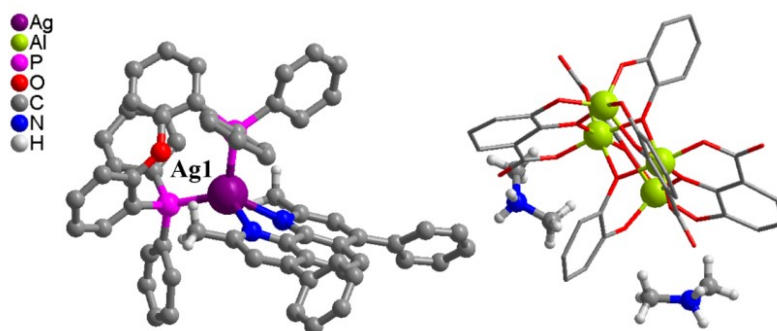

**Figure S4.** The asymmetric unit of **AIOC-169**, showing one  $\text{Al}_4$  cluster, one  $[\text{Ag}(\text{dmdpp})(\text{DPEphos})]^+$  unit, and two  $(\text{Me}_2\text{NH}_2)^+$  cations (Other  $(\text{Me}_2\text{NH}_2)^+$  cation and solvent molecules could not be located because of high disorder).

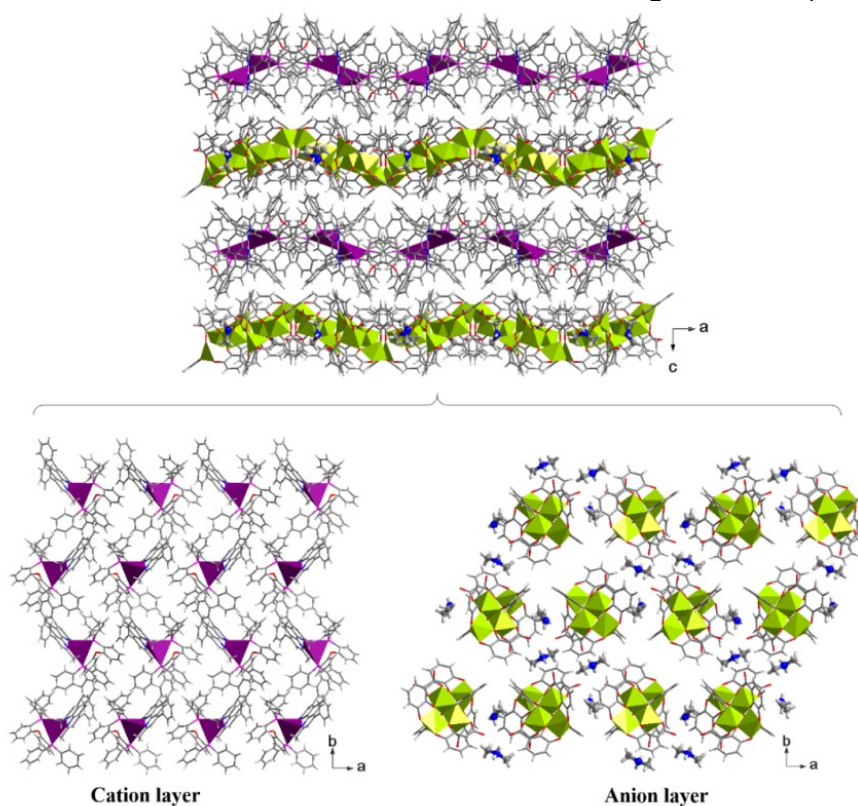

**Figure S5.** The packed structure along the b-axis composed of cationic  $[\text{Ag}(\text{dmdpp})(\text{DPEphos})]^+$  layer and anionic  $\text{Al}_4$  layer in **AIOC-169**, in which the  $(\text{Me}_2\text{NH}_2)^+$  counteranions are located in the anion layer.

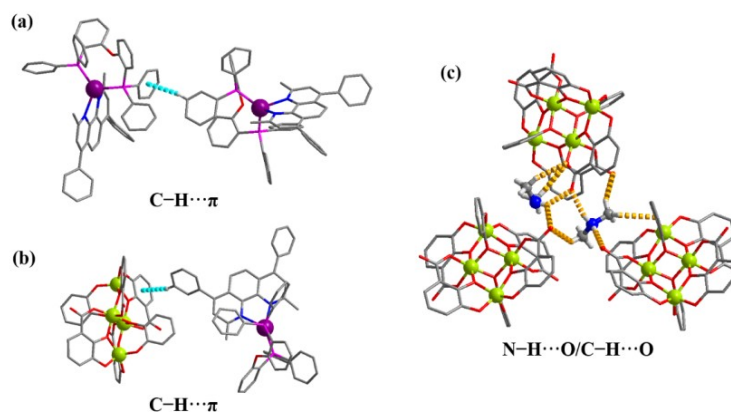

**Figure S6.** The supramolecular interactions in **AIOC-169**.

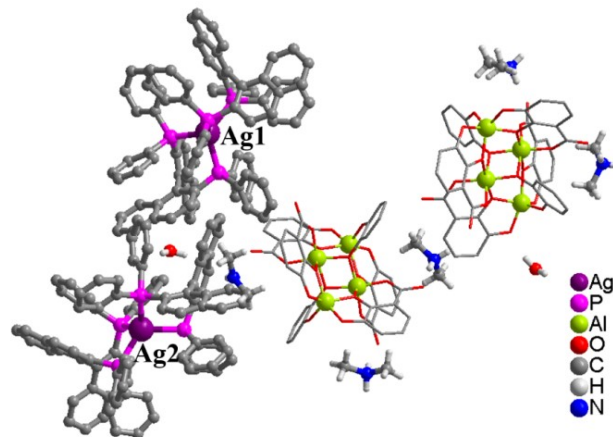

**Figure S7.** The asymmetric unit of **AIOC-170(R)**, showing two  $\text{Al}_4$  clusters, two  $[\text{Ag}(\text{R}-\text{binap})_2]^+$  units, five  $(\text{Me}_2\text{NH}_2)^+$  cations, and two  $\text{H}_2\text{O}$  molecules. (Other  $(\text{Me}_2\text{NH}_2)^+$  cation and solvent molecules could not be located because of high disorder).

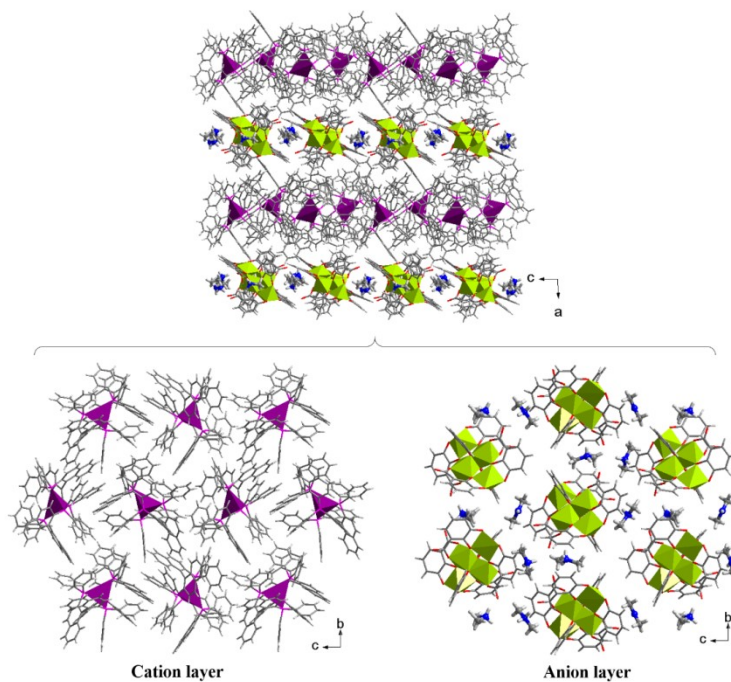

**Figure S8.** The packed structure along the  $b$ -axis composed of cationic  $[\text{Ag}(\text{R}-\text{binap})_2]^+$  layer and anionic  $\text{Al}_4$  layer in **AIOC-170(R)**, in which the  $(\text{Me}_2\text{NH}_2)^+$  counterions are located in the anion layer.

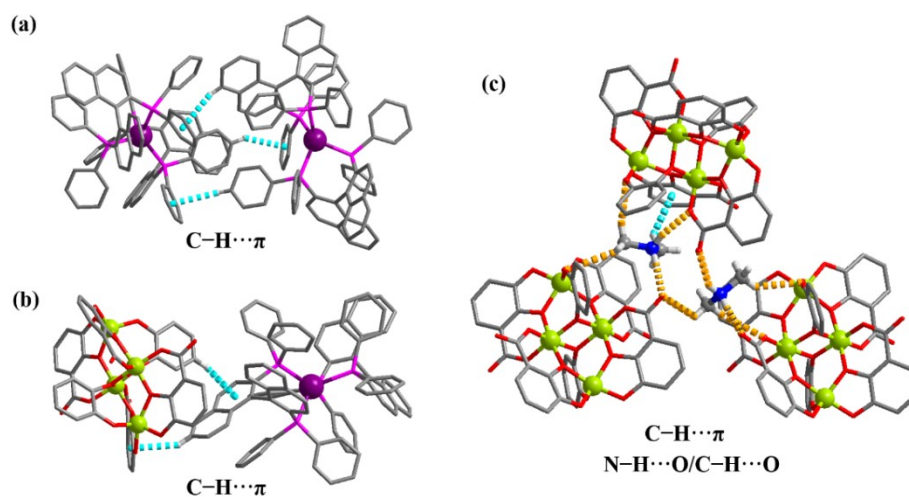

**Figure S9.** The supramolecular interactions in **AIOC-170(R)**.

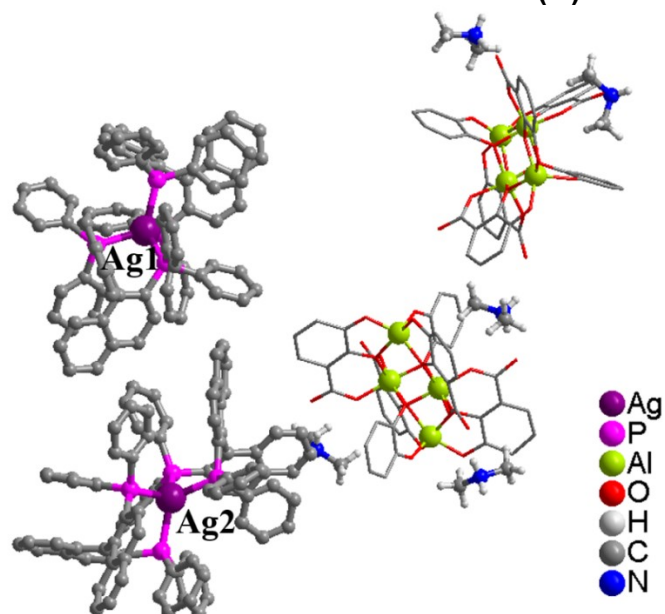

**Figure S10.** The asymmetric unit of **AIOC-170(S)**, showing two  $\text{Al}_4$  clusters, two  $[\text{Ag}(\text{S-binap})_2]^+$  units, and five  $(\text{Me}_2\text{NH}_2)^+$  cations. (Other  $(\text{Me}_2\text{NH}_2)^+$  cation and solvent molecules could not be located because of high disorder).

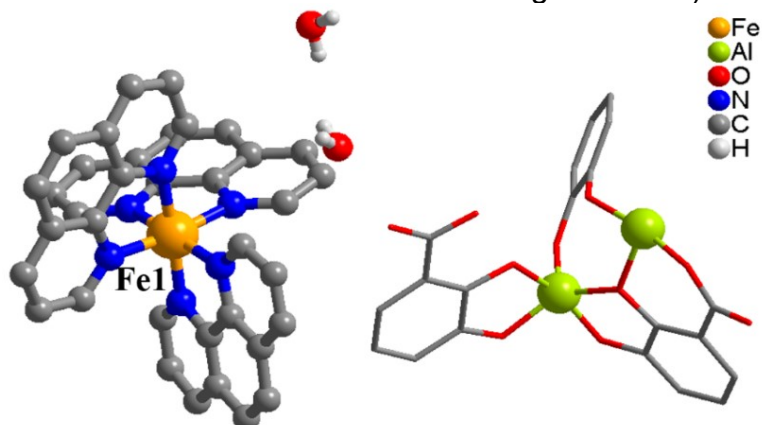

**Figure S11.** The asymmetric unit of **AIOC-171**, showing half of  $\text{Al}_4$  cluster, one  $[\text{Fe}(\text{phen})_3]^{2+}$  unit, and two  $\text{H}_2\text{O}$  molecules (Other solvents could not be located because of high disorder).

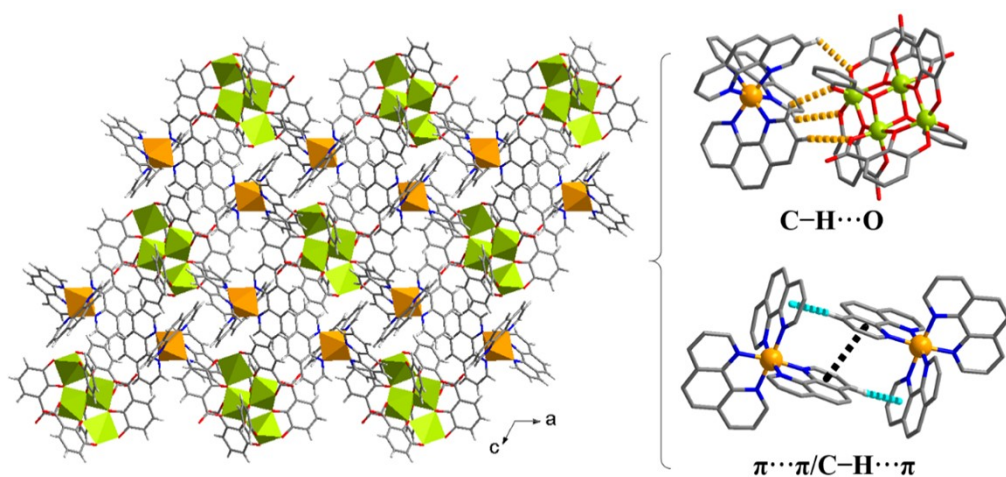

**Figure S12.** The packed structure along the b-axis and the supramolecular interactions in **AIOC-171**.

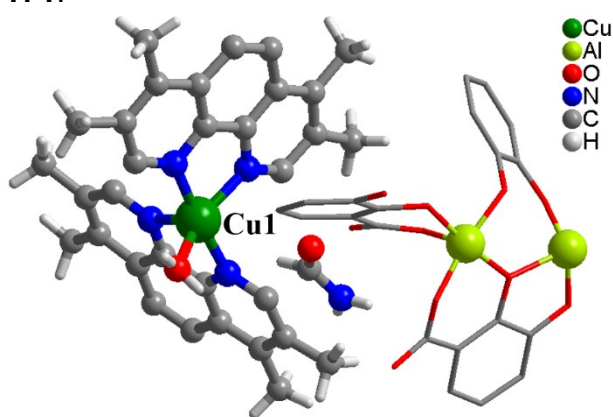

**Figure S13.** The asymmetric unit of **AIOC-172**, showing half of Al<sub>4</sub> cluster, one [Cu(Me<sub>4</sub>phen)<sub>2</sub>(H<sub>2</sub>O)]<sup>2+</sup> unit, and one NMF molecule (Other solvents could not be located because of high disorder).

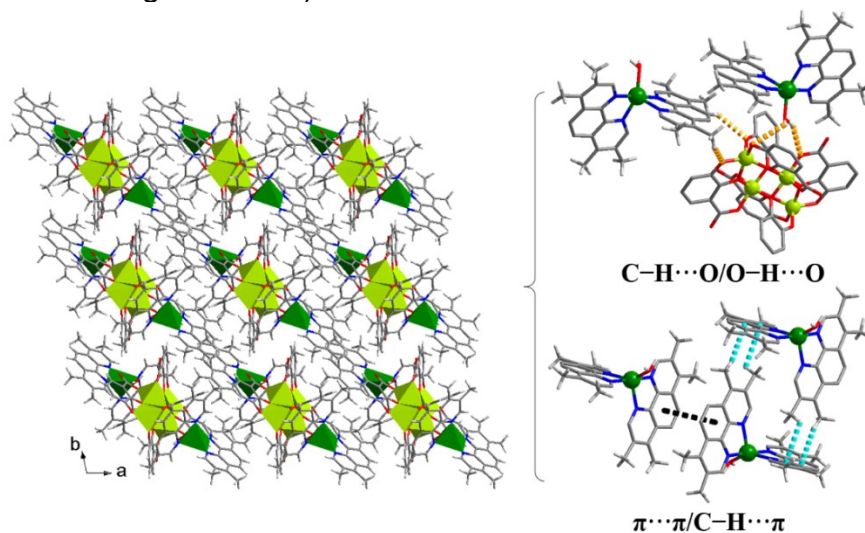

**Figure S14.** The packed structure along the c-axis and the supramolecular interactions in **AIOC-172**.



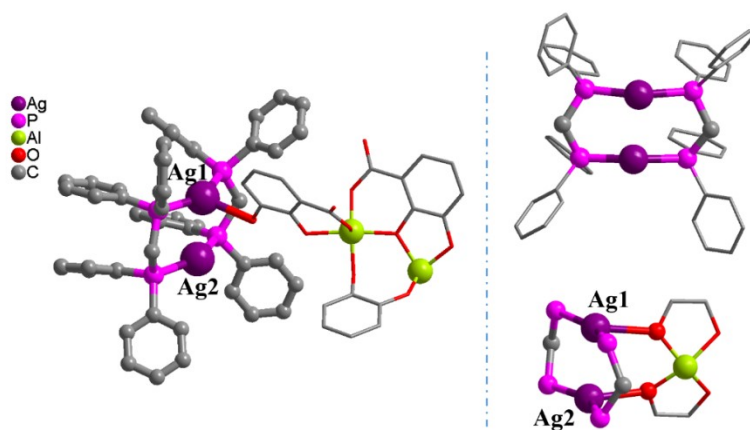

**Figure S15.** (Left) The asymmetric unit of **AIOC-173**, showing half of  $\text{Al}_4$  cluster, one  $[\text{Ag}_2(\text{bdpm})_2]^{2+}$  cycle (Solvents could not be located because of high disorder). (Right) The coordination environment of  $\text{Ag}(\text{I})$  atoms.

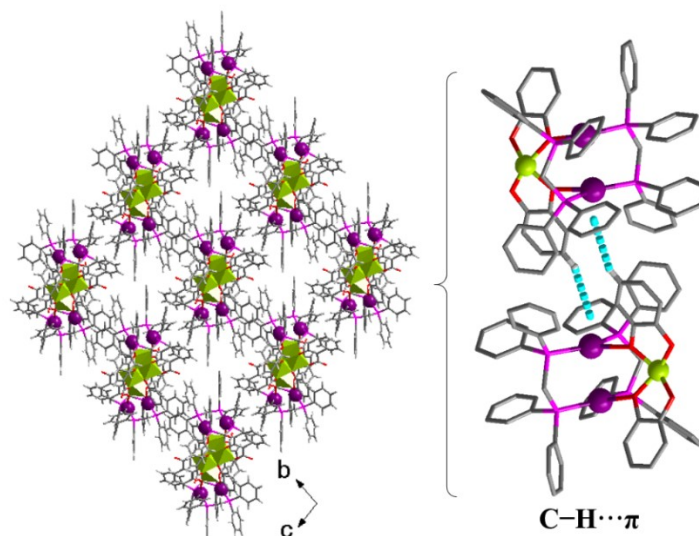

**Figure S16.** The packed structure along the a-axis and the supramolecular interactions in **AIOC-173**.

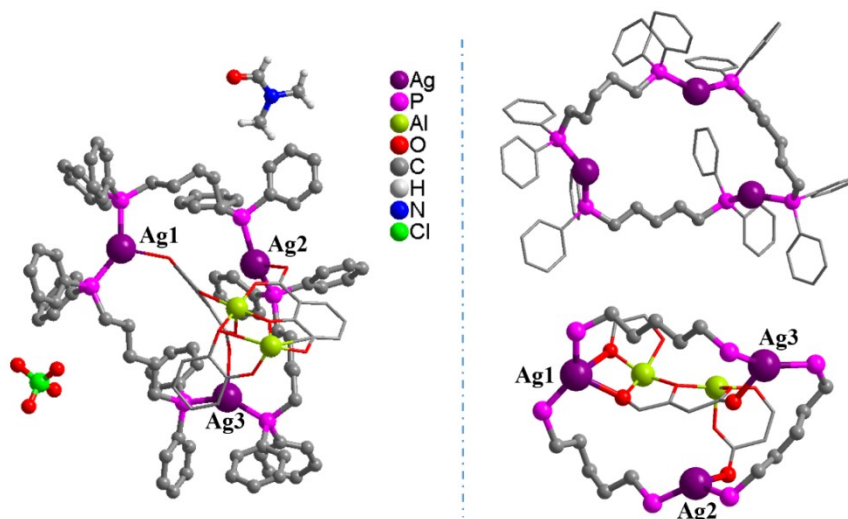

**Figure S17.** (Left) The asymmetric unit of **AIOC-174**, showing half of  $\text{Al}_4$  cluster, one  $[\text{Ag}_3(1,5\text{-bdpp})_3]^{3+}$  cycle, one  $(\text{ClO}_4)^-$  anion and one DMF molecule (Other solvents could not be located because of high disorder). (Right) The coordination environment of  $\text{Ag}(\text{I})$  atoms.

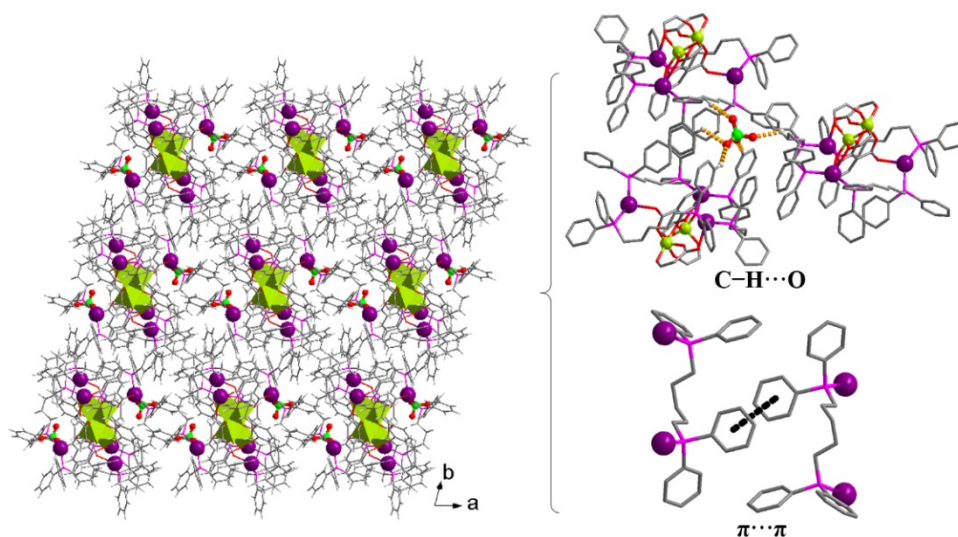

**Figure S18.** The packed structure along the c-axis and the supramolecular interactions in **AIOC-174**.

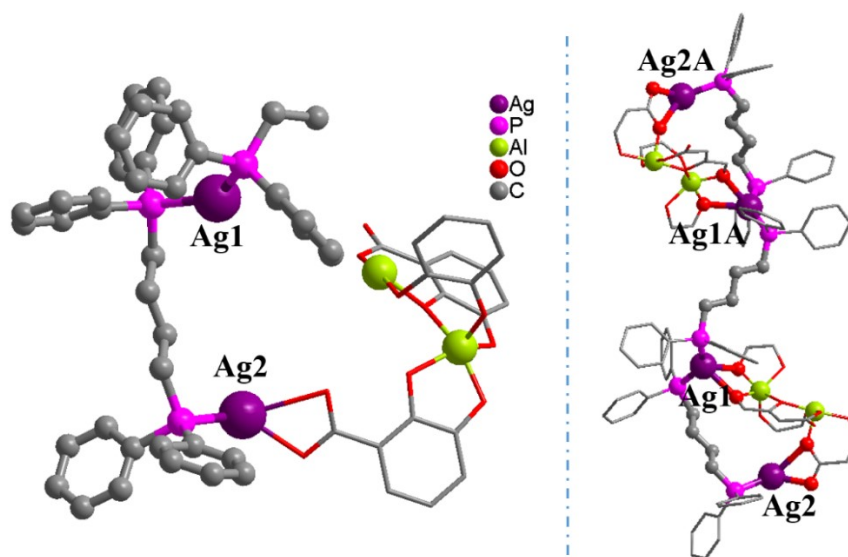

**Figure S19.** (Left) The asymmetric unit of **AIOC-175**, showing half of  $\text{Al}_4$  cluster, two  $\text{Ag(I)}$  atoms, and one and a half **1,4-bdpp** ligands (Solvents could not be located because of high disorder). (Right) The coordination environment of  $\text{Ag(I)}$  atoms.

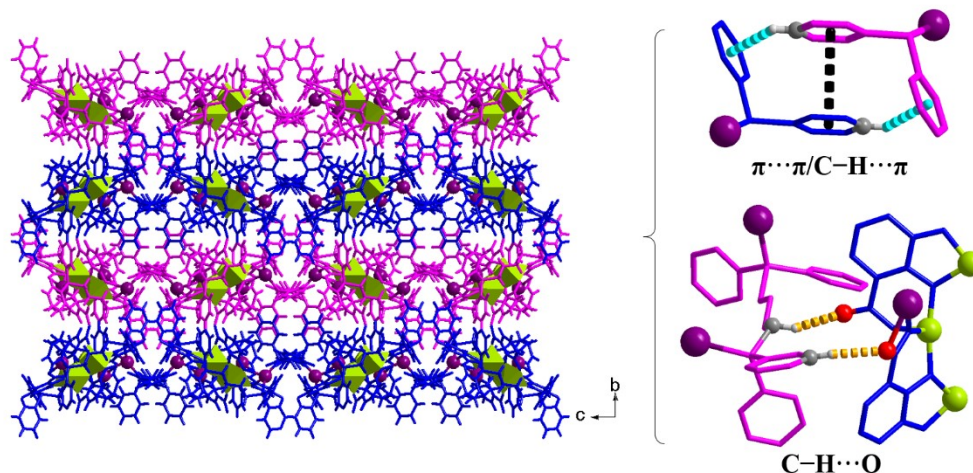

**Figure S20.** The packed structure along the a-axis and the interactions between adjacent chains in **AIOC-175**.

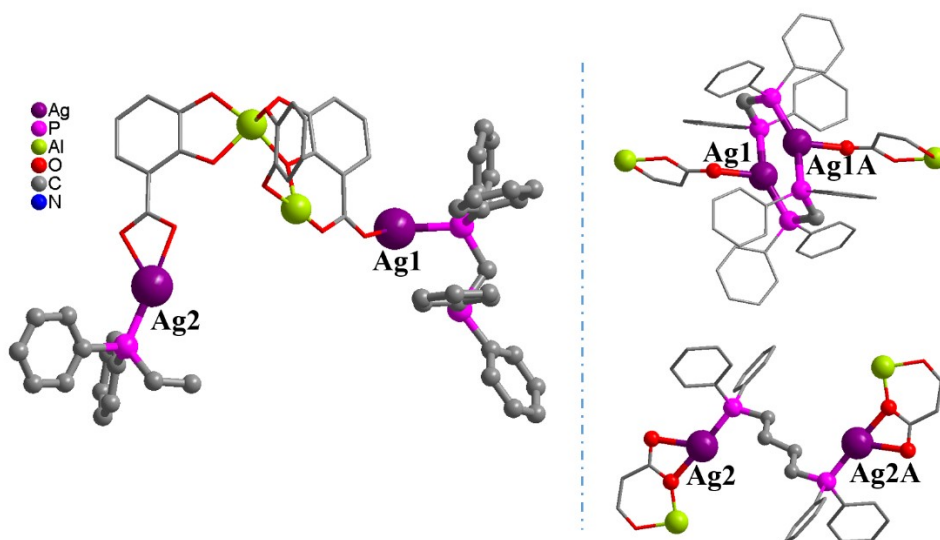

**Figure S21.** (Left) The asymmetric unit of **AIOC-176**, showing half of Al<sub>4</sub> cluster, two Ag( I ) atoms, one bdpm ligand, and half of **1,4-bdpp** ligand (Solvents could not be located because of high disorder). (Right) The coordination environment of Ag( I ) atoms.

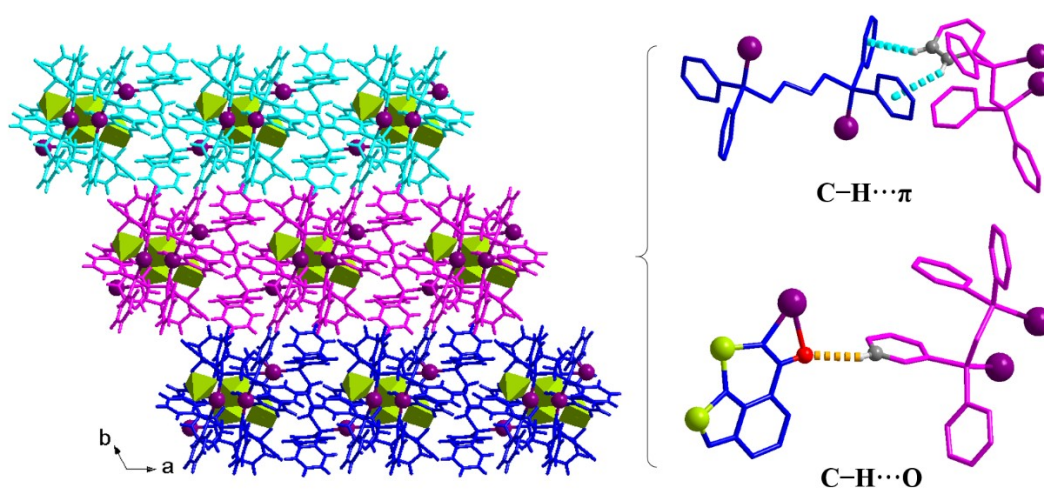

**Figure S22.** The packed structure along the c-axis and the interactions between adjacent layers in **AIOC-176**.

### 3. PXRD analyses of AIOC-168 to AIOC-176.

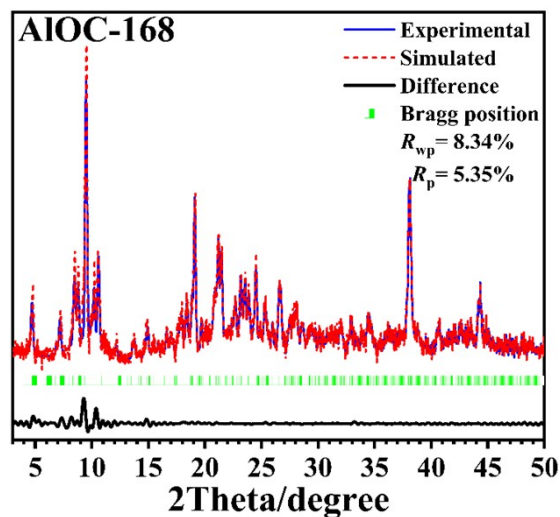

Figure S23. PXRD analyses for **AIOC-168**.

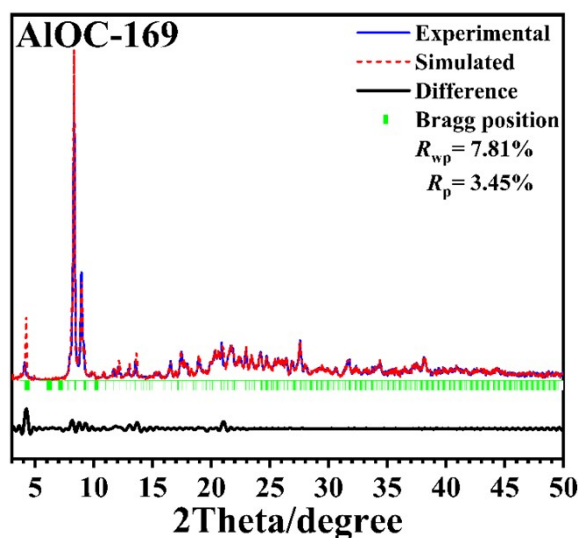

Figure S24. PXRD analyses for **AIOC-169**.

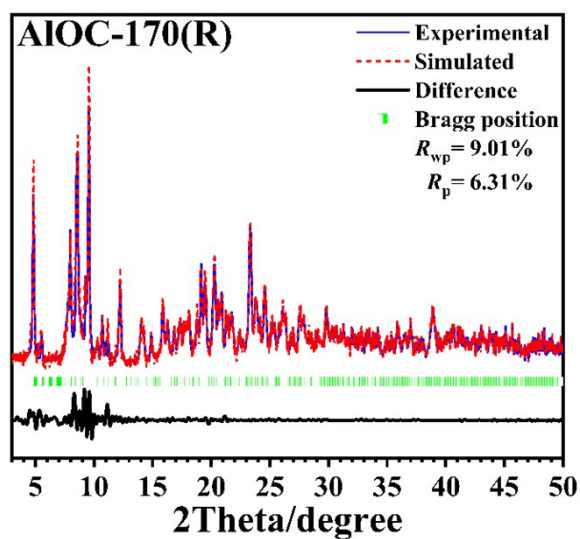

Figure S25. PXRD analyses for **AIOC-170(R)**.

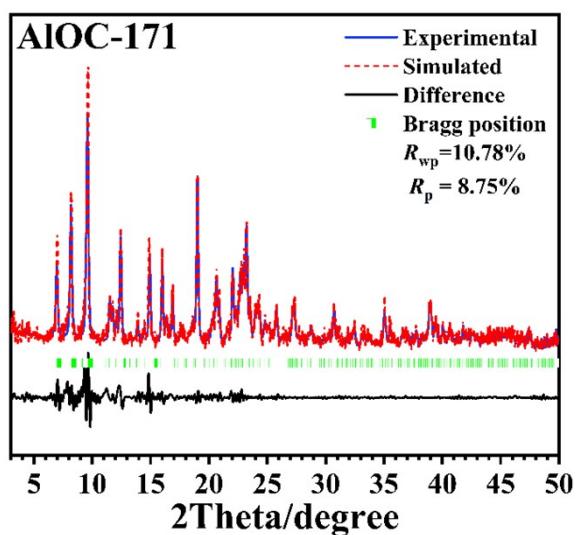

Figure S26. PXRD analyses for AIOC-171.

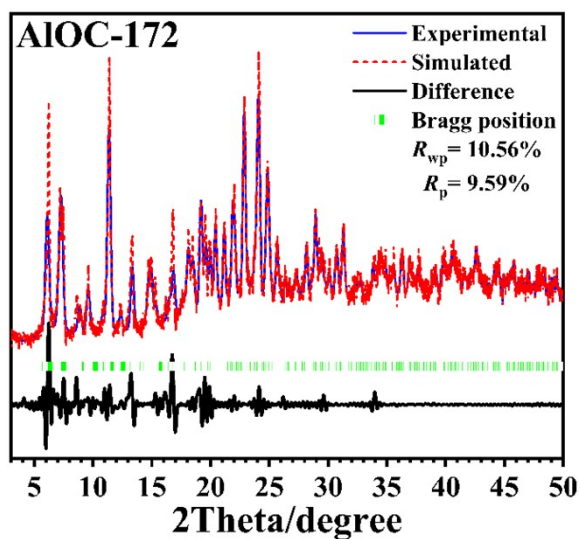

Figure S27. PXRD analyses for AIOC-172.

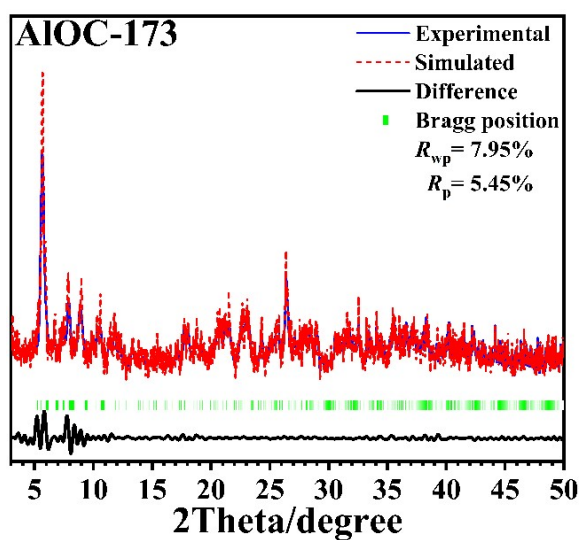

Figure S28. PXRD analyses for AIOC-173.

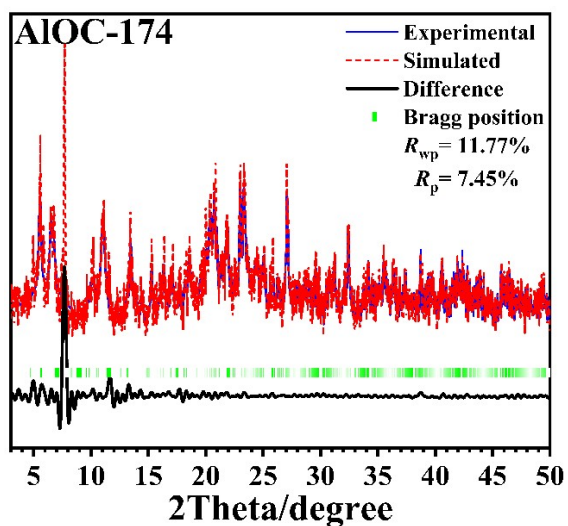

Figure S29. PXRD analyses for **AIOC-174**.

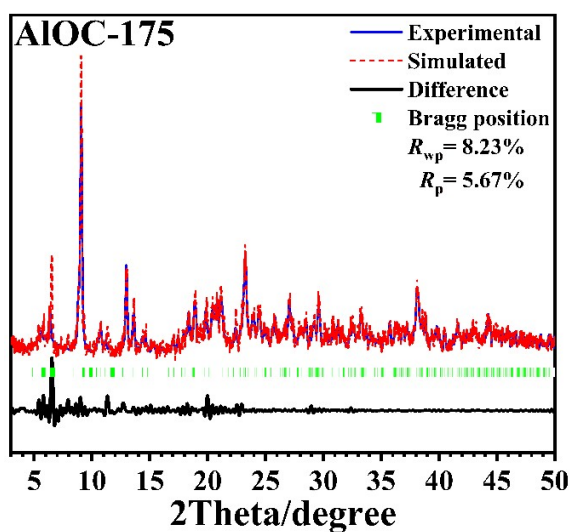

Figure S30. PXRD analyses for **AIOC-175**.

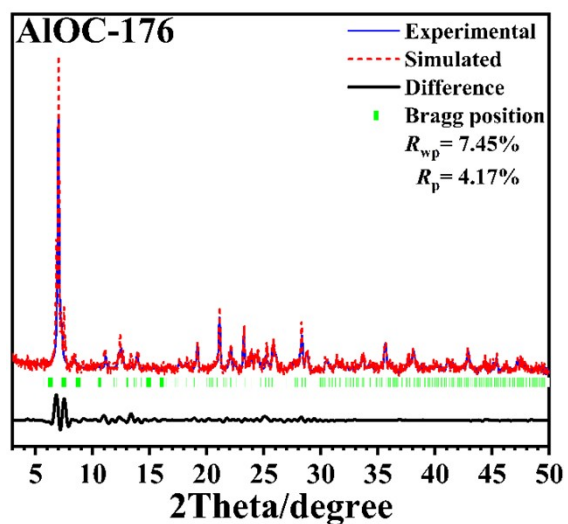

Figure S31. PXRD analyses for **AIOC-176**.

To quantitatively evaluate the degree of coincidence between experimental data

and simulated data in PXRD, we did Le Bail fits for all structures (Figures S23-S31). In Le Bail fit, the most important data are  $R_{wp}$  and  $R_p$ . If  $R_{wp}$  and  $R_p$  are both  $< 10\%$ , or one of them  $< 10\%$ , the other is close to  $10\%$ , it means the degree of coincidence between experimental data and simulated data is good, and the phase purity is pretty good. As shown in Figures S23-S31, nearly  $R_{wp}$  and  $R_p$  in all structures are in line with the above criteria, indicating that these compounds have high phase purity.

#### 4. The TGA curves of AIOC-168 to AIOC-176.

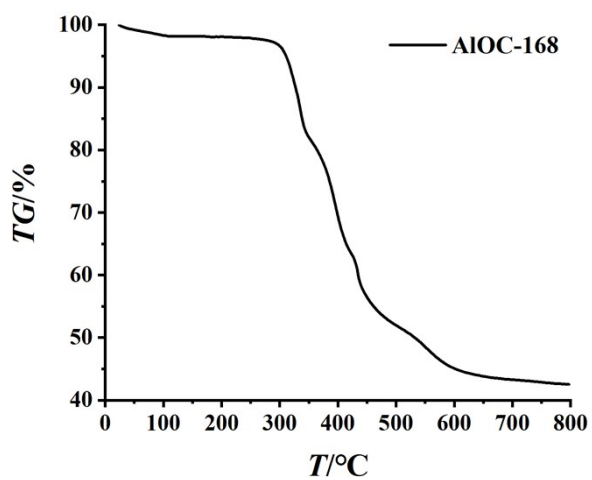

Figure S32. The TGA curve of AIOC-168.

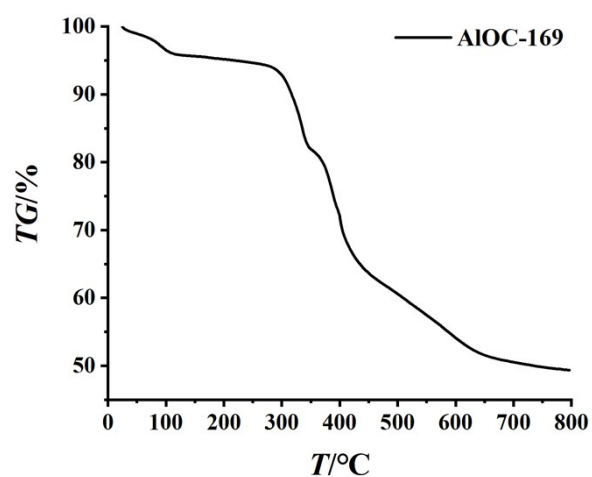

Figure S33. The TGA curve of AIOC-169.

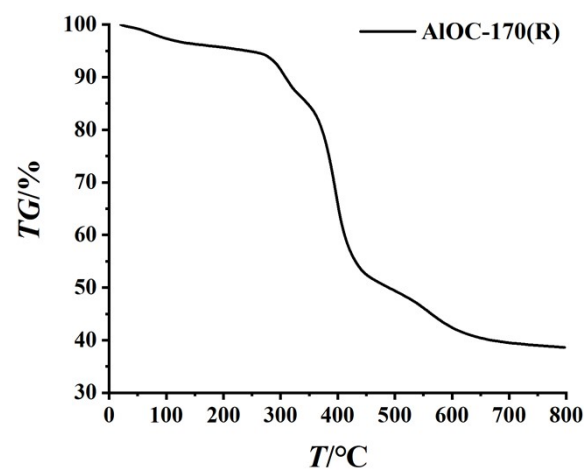

Figure S34. The TGA curve of AIOC-170(R).



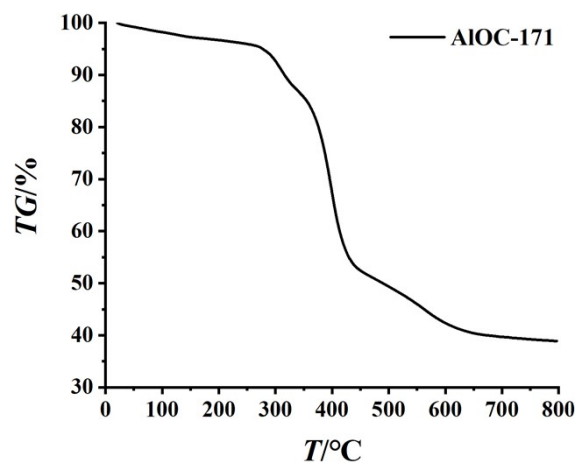

Figure S35. The TGA curve of AIOC-171.

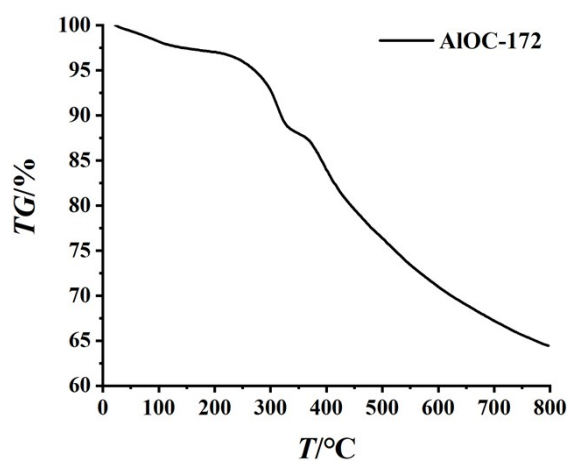

Figure S36. The TGA curve of AIOC-172.

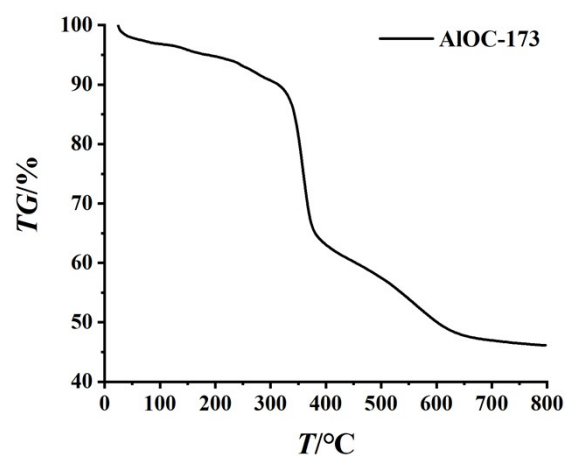

Figure S37. The TGA curve of AIOC-173.

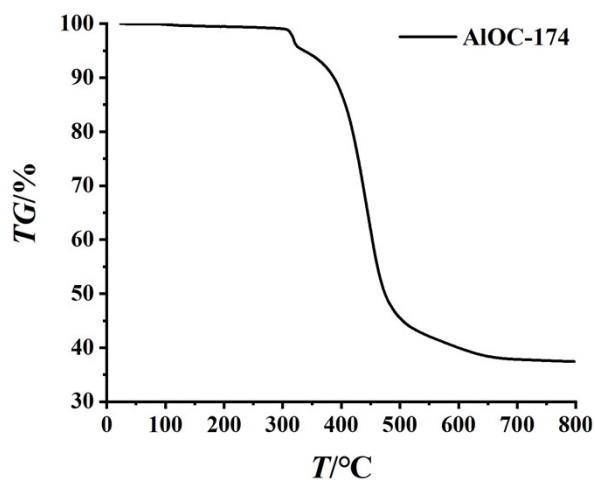

**Figure S38.** The TGA curve of **AIOC-174**.

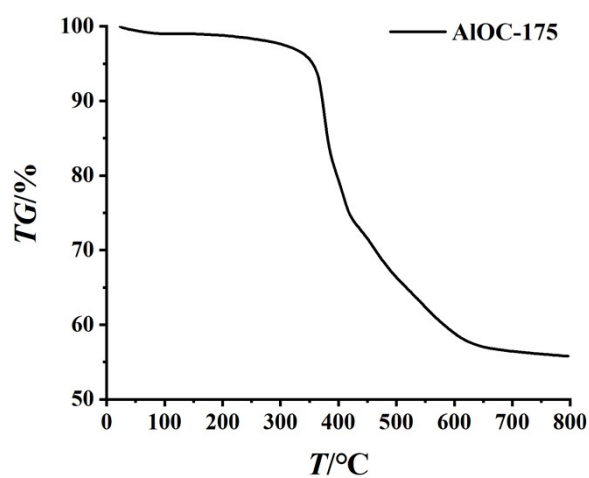

**Figure S39.** The TGA curve of **AIOC-175**.

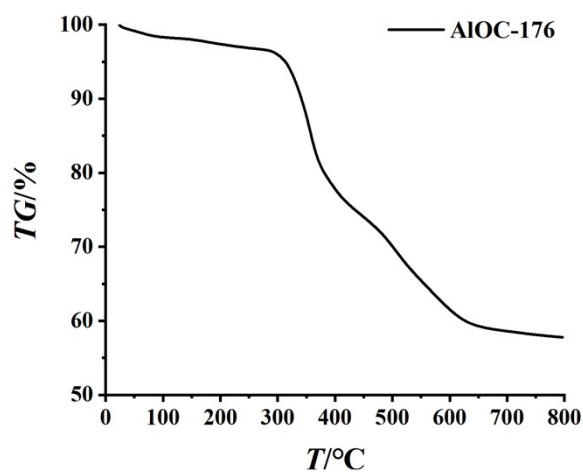

**Figure S40.** The TGA curve of **AIOC-176**.

TGA curves of **AIOC-168-176** were carried out from room temperature to 800 °C with a heating speed of 10 °C/min in a flowing N<sub>2</sub> atmosphere (Figures S32-S40).

Except for **AIOC-174** (no apparent weight loss), all the samples have a small weight loss before 110 °C, which is related to the removal of EtOH and H<sub>2</sub>O or H<sub>2</sub>O (for **AIOC-172**) molecules (lower boiling point). It is clear that there is almost no obvious weight loss from 110-250 °C, indicating that DMF or NMF (high boiling point) are not present in their structure. The above results show that there are a few solvent molecules in the structure of these compounds, which further indicates that their supramolecular packing structures are dense. Around 300 °C, these compounds began to decompose, and the residues may be Al<sub>2</sub>O<sub>3</sub>, AgO or Fe<sub>2</sub>O<sub>3</sub> and CuO, etc.

5. The UV/Vis absorption spectra of  $Al_4$  precursor and compounds AIOC-168 to AIOC-176.

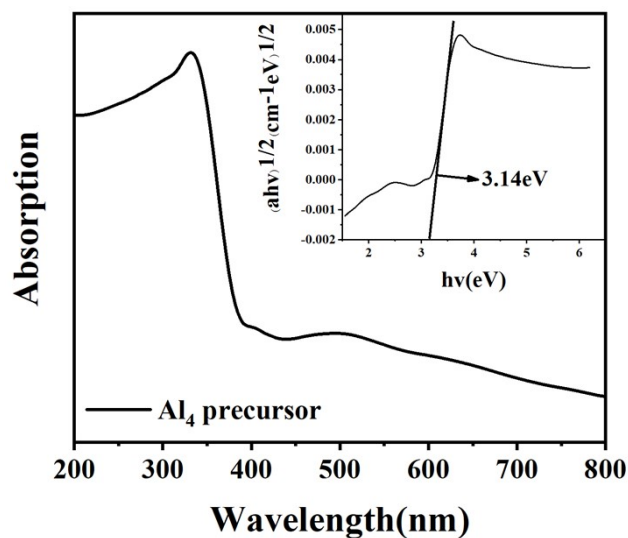

Figure S41. The solid-state absorption spectra of  $Al_4$  precursor.

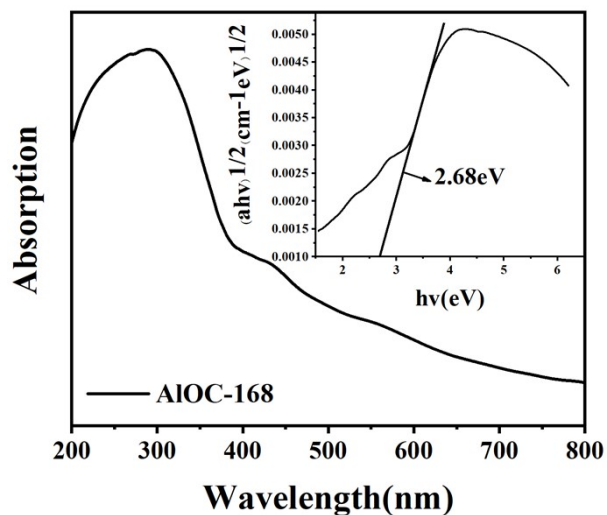

Figure S42. The solid-state absorption spectra of AIOC-168.

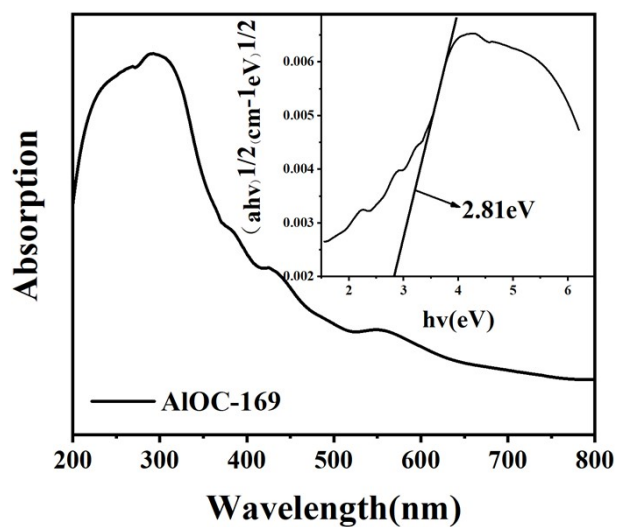

Figure S43. The solid-state absorption spectra of AIOC-169.

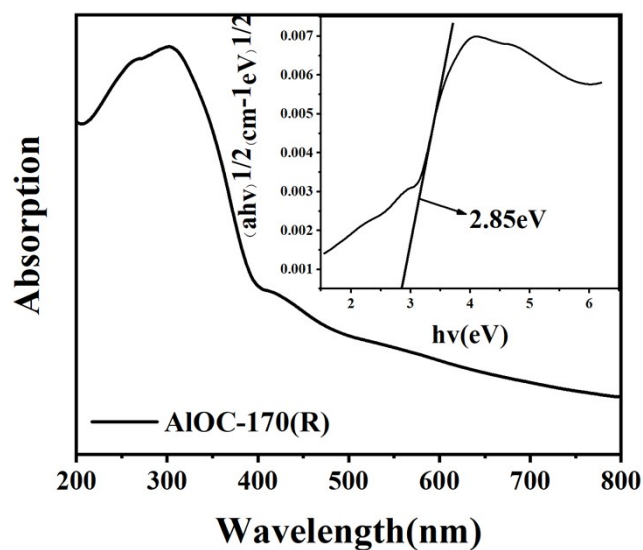

Figure S44. The solid-state absorption spectra of AIOC-170(R).

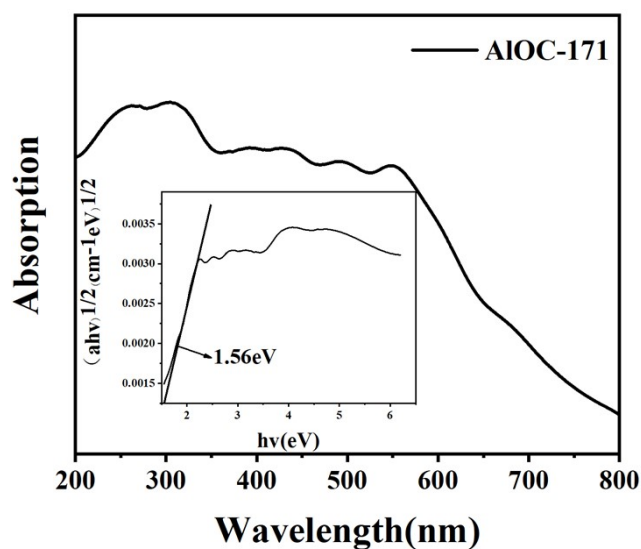

Figure S45. The solid-state absorption spectra of AIOC-171.

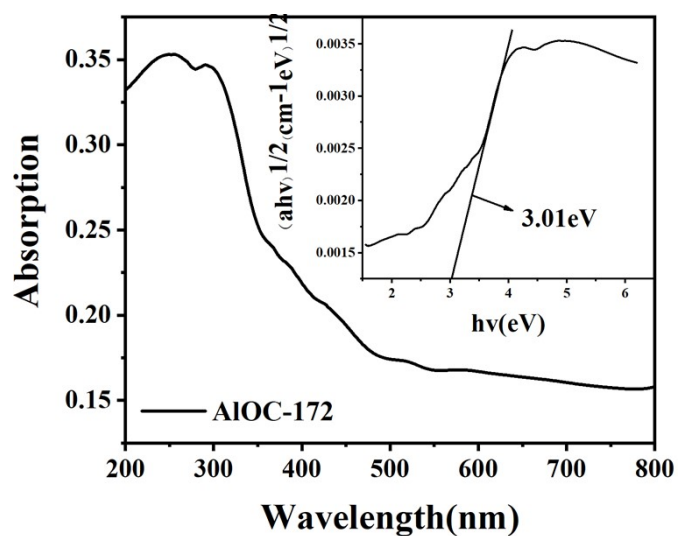

Figure S46. The solid-state absorption spectra of AIOC-172.

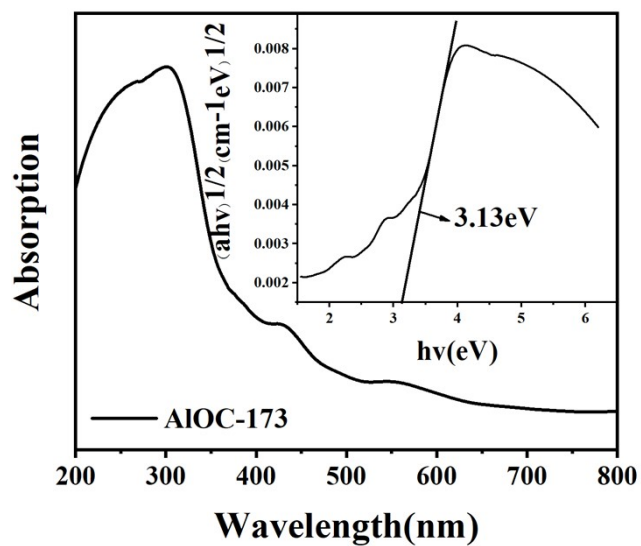

Figure S47. The solid-state absorption spectra of **AIOC-173**.

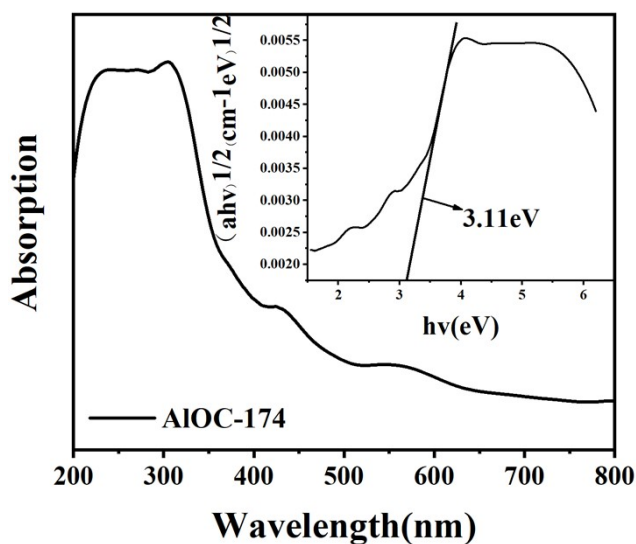

Figure S48. The solid-state absorption spectra of **AIOC-174**.

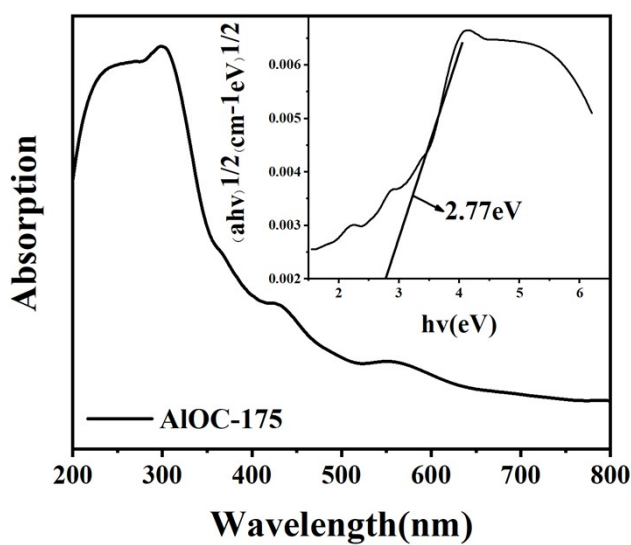

Figure S49. The solid-state absorption spectra of **AIOC-175**.

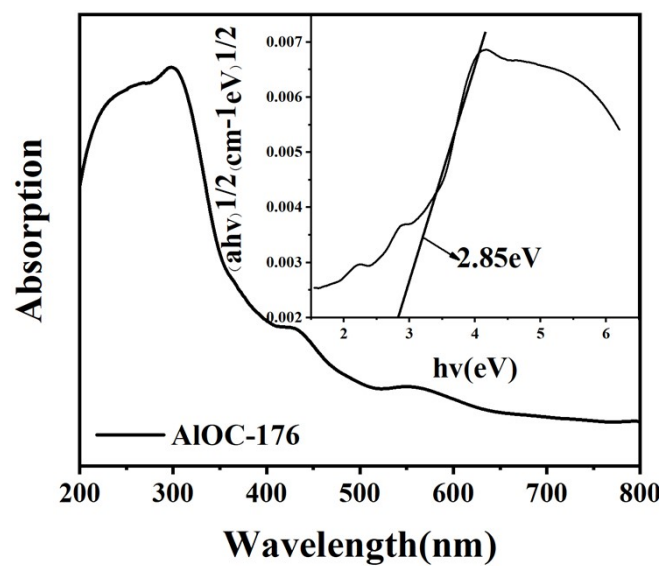

**Figure S50.** The solid-state absorption spectra of **AIOC-176**.

## 6. The EDS spectra of AIOC-168 to AIOC-176.

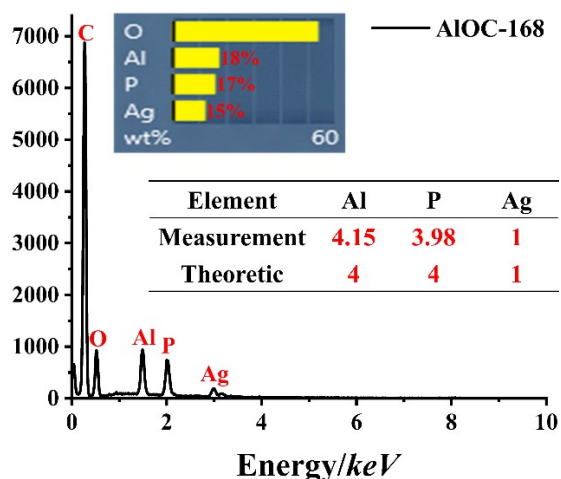

Figure S51. The EDS spectra of AIOC-168.

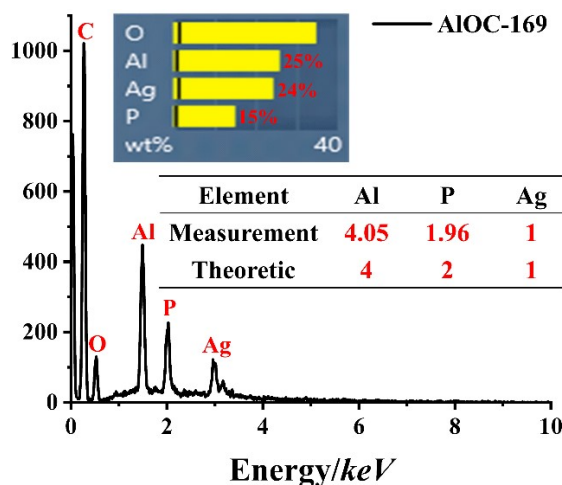

Figure S52. The EDS spectra of AIOC-169.

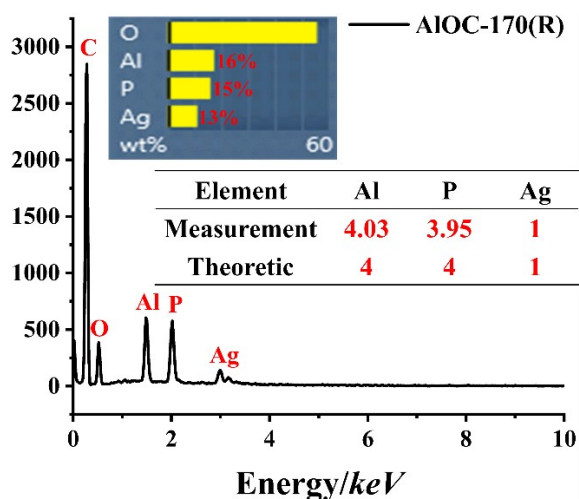

Figure S53. The EDS spectra of AIOC-170.

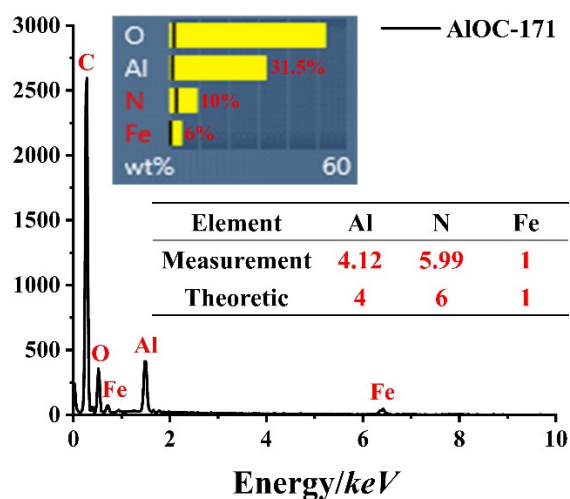

Figure S54. The EDS spectra of AIOC-171.

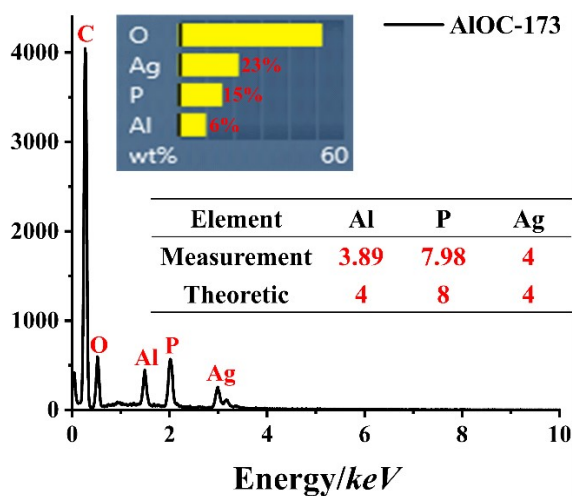

Figure S55. The EDS spectra of AIOC-173.

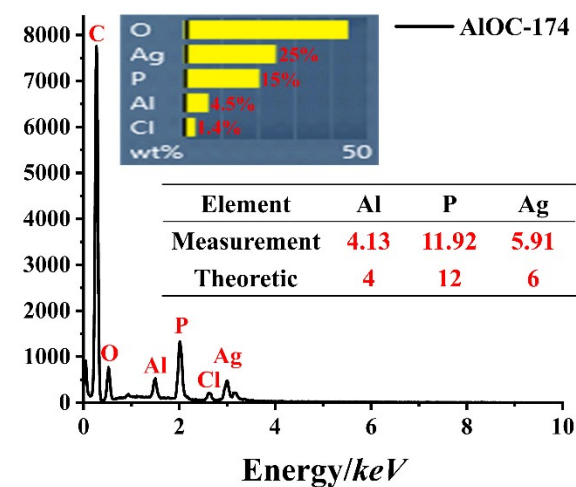

Figure S56. The EDS spectra of AIOC-174.



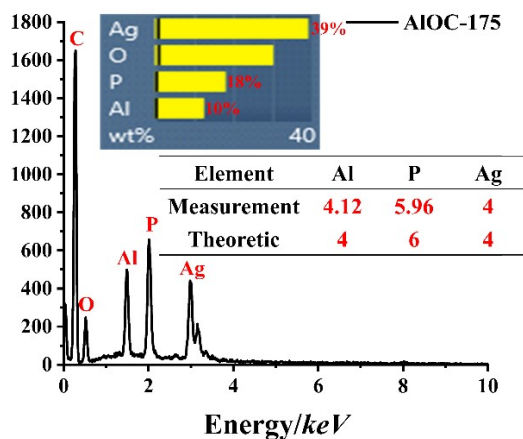

**Figure S57.** The EDS spectra of **AIOC-175**.

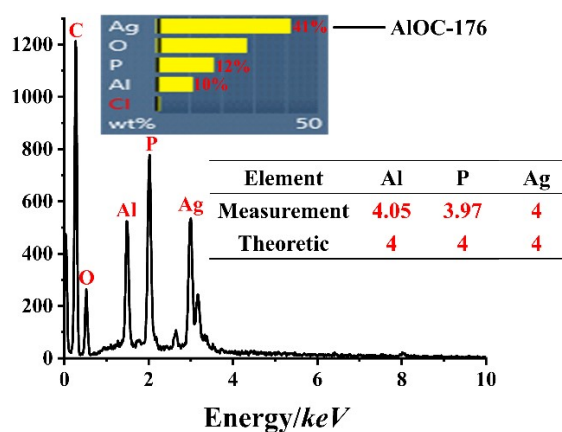

**Figure S58.** The EDS spectra of **AIOC-176**.

From the EDS data of these compounds, the elements (mainly Al, P, Ag) are also analyzed in detail. By calculation, the mass percentage (Wt %) of these elements is converted to the atomic ratio, as shown in Figures S51-S58. The results show that the atomic ratio of Al, P, and Ag elements is almost consistent with the theoretical (obtained from single crystal structure data), which further indicates the high purity of these samples.

## 7. The Fluorescence Property.

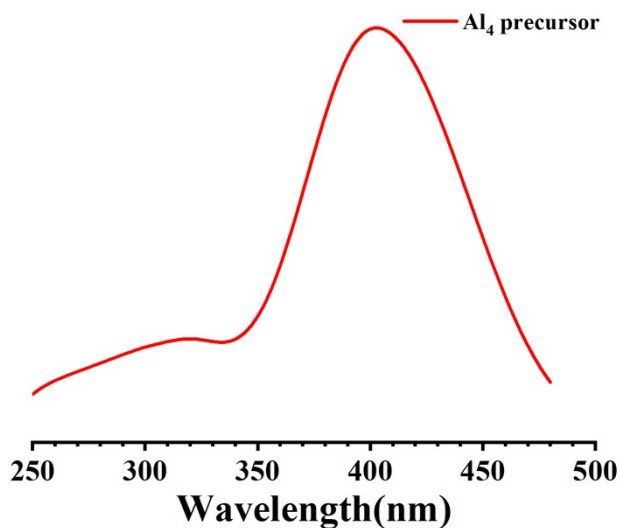

Figure S59. The excitation spectrum of  $\text{Al}_4$  precursor.

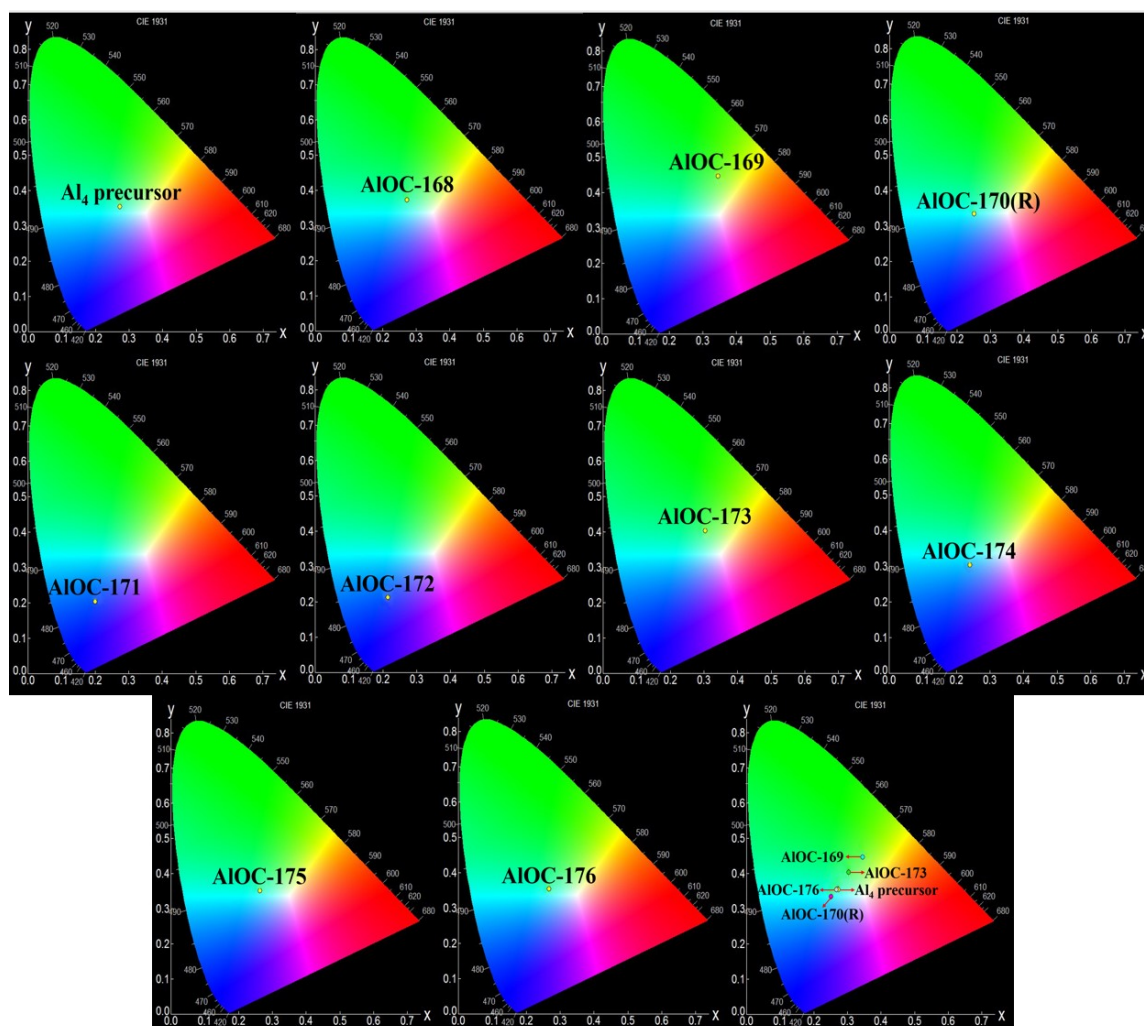

Figure S60. The CIE coordinates of  $\text{Al}_4$  precursor and compounds AIOC-168 to AIOC-176.

## 8. CD spectra.

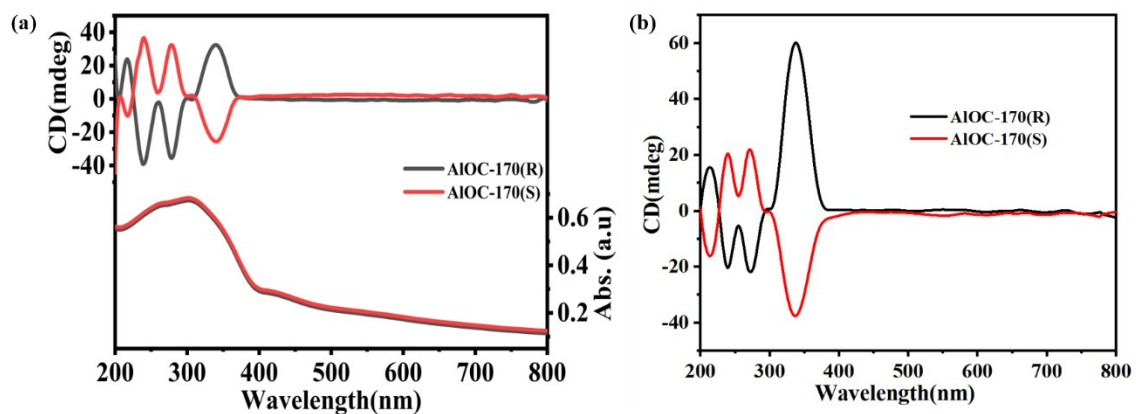

**Figure S61.** (a) CD spectra of AIOC-170(R) and AIOC-170(S) in methanol and UV-vis spectra of AIOC-170(R) and AIOC-170(S) in solid-state. (b) Solid-state CD spectra for **AIOC-170(R)** and **AIOC-170(S)**.

## 9. IR spectrum.

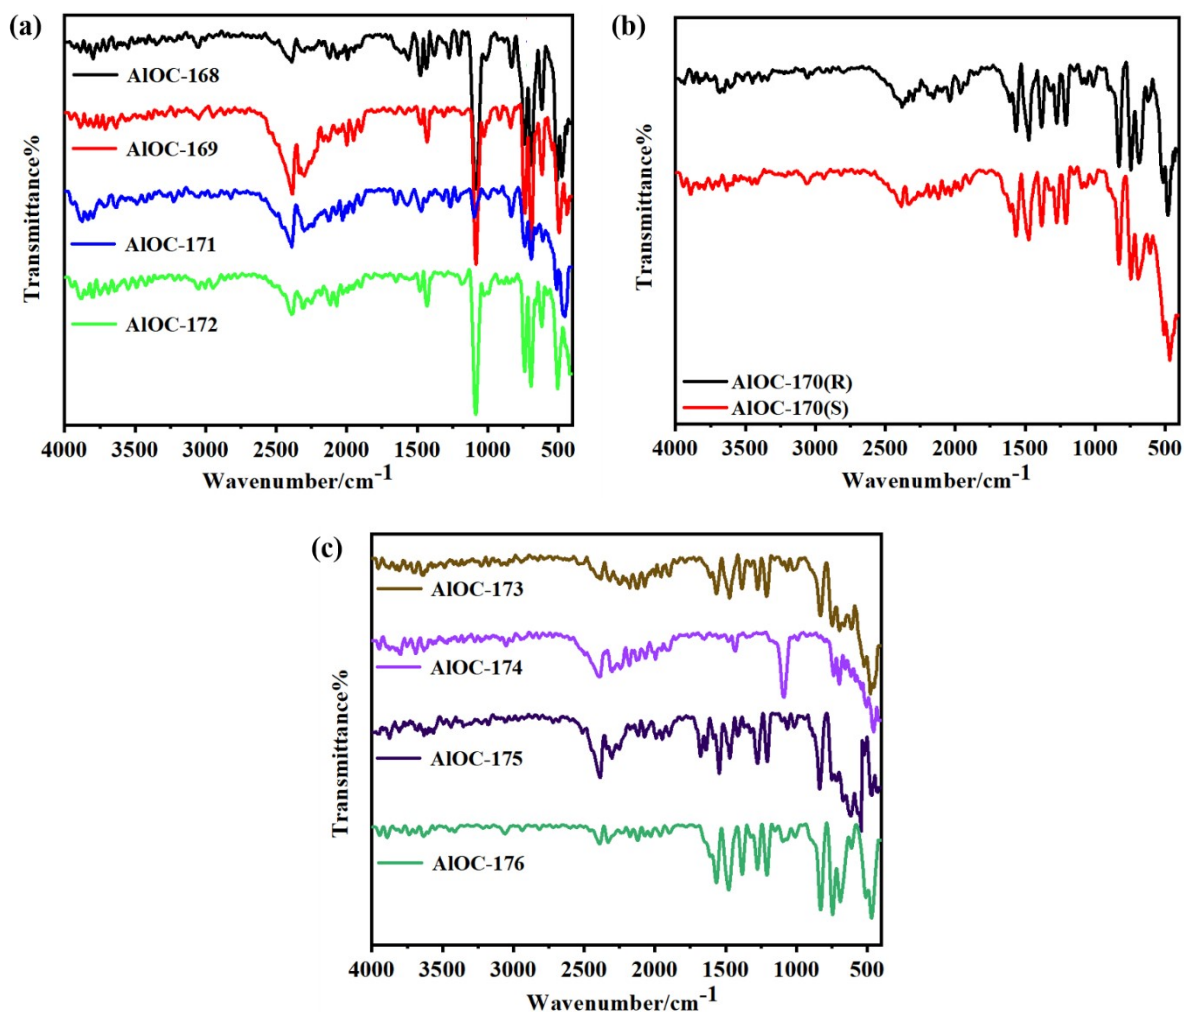

**Figure S62. IR spectrum of AIOC168-176.**

The vibrations near 3050 cm<sup>-1</sup> are attributed to C-H stretching in aromatic rings. The band at 1550 cm<sup>-1</sup> corresponds to asymmetric stretching of carboxylate groups. Symmetric stretching of carboxylate groups is observed at 1420 cm<sup>-1</sup>. The vibration at 1090 cm<sup>-1</sup> is ascribed to C-N vibrations in the dimethylamine guest molecule. This confirms the structural accuracy.

## 10. The NLO Property.

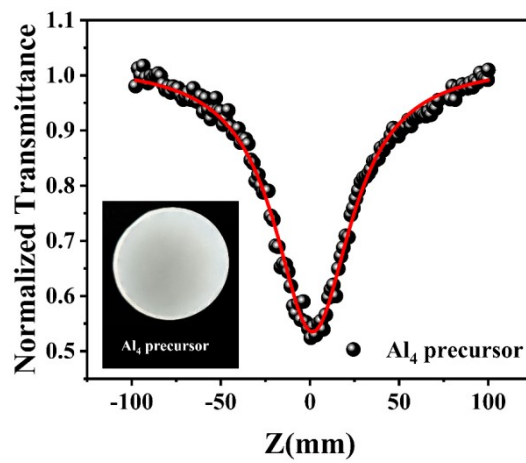

Figure S63. The Z-scan curve of  $Al_4$  precursor.

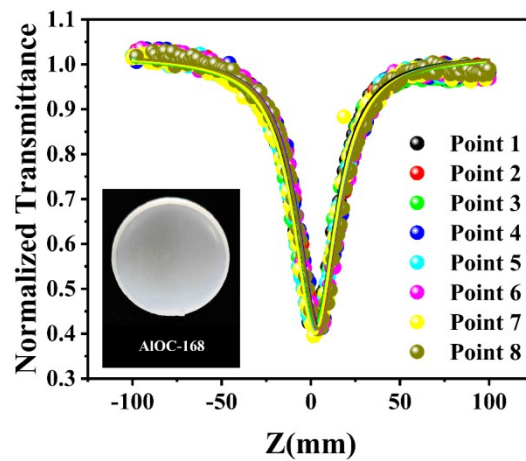

Figure S64. The Z-scan curve of AIOC-168.

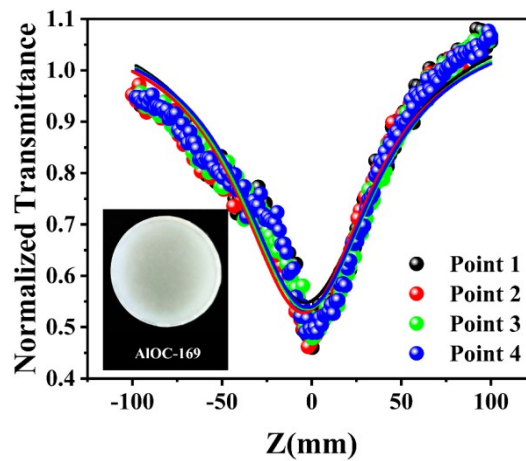

Figure S65. The Z-scan curve of AIOC-169.

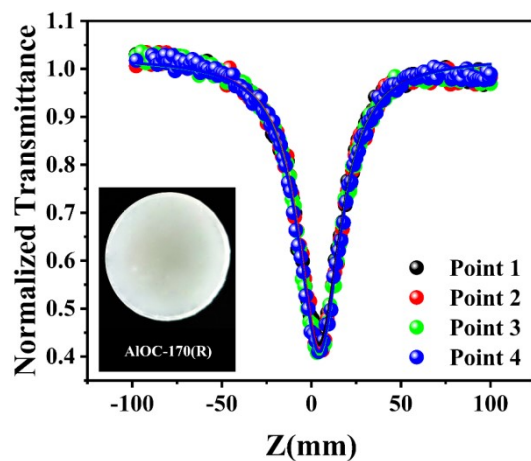

Figure S66. The Z-scan curve of AIOC-170(R).

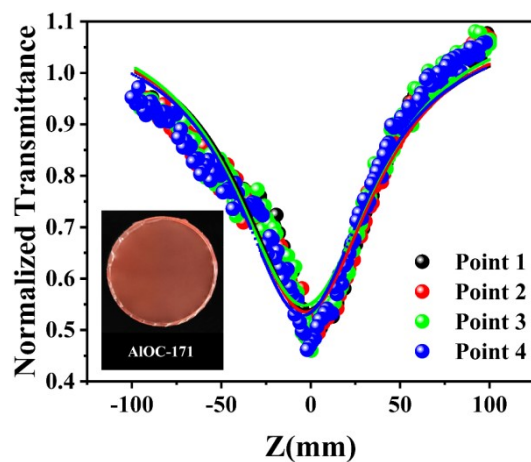

Figure S67. The Z-scan curve of AIOC-171.

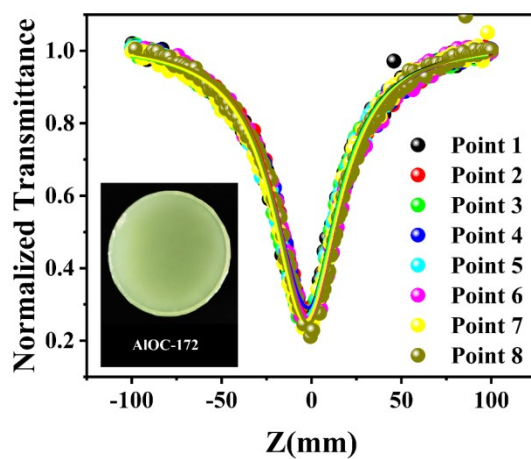

Figure S68. The Z-scan curve of AIOC-172.

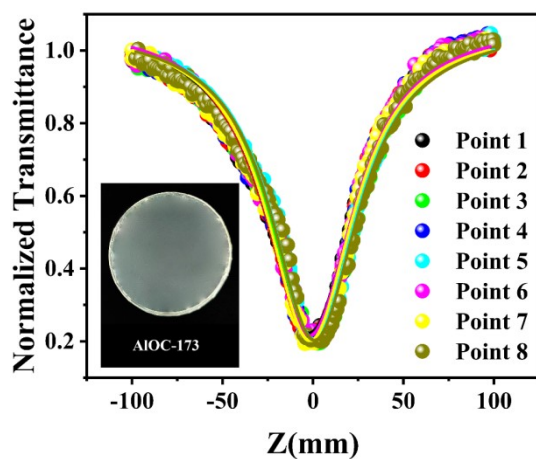

**Figure S69.** The Z-scan curve of **AIOC-173**.

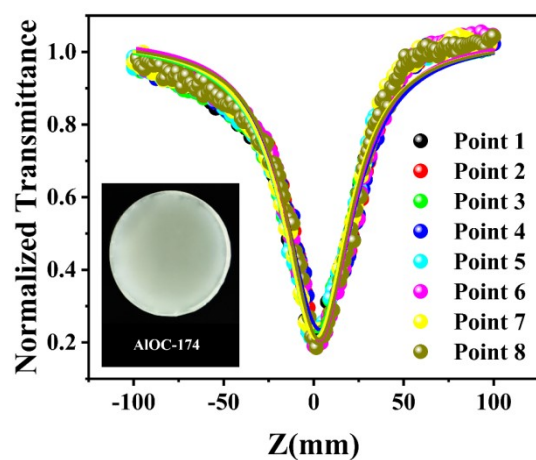

**Figure S70.** The Z-scan curve of **AIOC-174**.

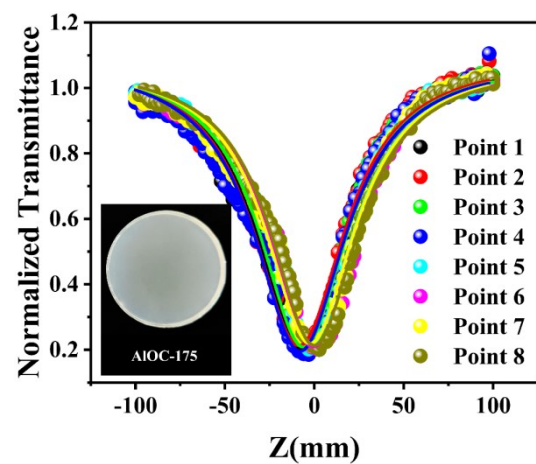

**Figure S71.** The Z-scan curve of **AIOC-175**.

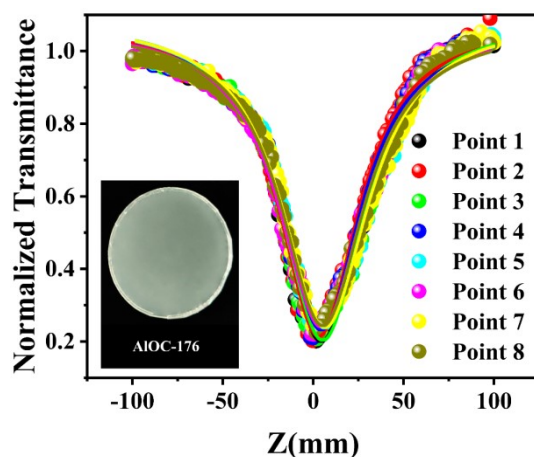

**Figure S72.** The Z-scan curve of **AIOC-176**.

**Table S4.** The third-order nonlinear optical parameters of compounds  $\text{Al}_4$  precursor and **AIOC-168** to **AIOC-176**.

| Samples                                   | T/% | $\beta$ (cm/GW) | $T_{\min}$ | $F_{\text{OL}}$ (J/cm <sup>2</sup> ) |
|-------------------------------------------|-----|-----------------|------------|--------------------------------------|
| <b><math>\text{Al}_4</math> precursor</b> | 70  | 98              | 0.51       | 5.12                                 |
| <b>AIOC-168</b>                           | 70  | 200             | 0.38       | 1.09                                 |
| <b>AIOC-169</b>                           | 70  | 120             | 0.44       | 3.45                                 |
| <b>AIOC-170(R)</b>                        | 70  | 220             | 0.40       | 1.23                                 |
| <b>AIOC-171</b>                           | 70  | 130             | 0.45       | 3.59                                 |
| <b>AIOC-172</b>                           | 70  | 700             | 0.23       | 0.61                                 |
| <b>AIOC-173</b>                           | 70  | 750             | 0.19       | 0.39                                 |
| <b>AIOC-174</b>                           | 70  | 730             | 0.21       | 0.86                                 |
| <b>AIOC-175</b>                           | 70  | 710             | 0.17       | 0.75                                 |
| <b>AIOC-176</b>                           | 70  | 700             | 0.18       | 0.33                                 |

**Table S5.** The comparison of the nonlinear absorption coefficients between this work and other work.

| Samples                                   | Nonlinear absorption coefficient $\beta$ (cm/GW) | References |
|-------------------------------------------|--------------------------------------------------|------------|
| <b><math>\text{Al}_4</math> precursor</b> | <b>98</b>                                        | This work  |
| <b>AIOC-168</b>                           | <b>200</b>                                       | This work  |
| <b>AIOC-169</b>                           | <b>120</b>                                       | This work  |



|                             |            |                                              |
|-----------------------------|------------|----------------------------------------------|
| <b>AIOC-170(R)</b>          | <b>220</b> | This work                                    |
| <b>AIOC-171</b>             | <b>130</b> | This work                                    |
| <b>AIOC-172</b>             | <b>700</b> | This work                                    |
| <b>AIOC-173</b>             | <b>750</b> | This work                                    |
| <b>AIOC-174</b>             | <b>730</b> | This work                                    |
| <b>AIOC-175</b>             | <b>710</b> | This work                                    |
| <b>AIOC-176</b>             | <b>700</b> | This work                                    |
| <b>AIOC-50</b>              | 1182       | <i>Angew. Chem. Int. Ed.</i> 2021, 60, 4849. |
| <b>AIOC-52</b>              | 4384       | <i>Angew. Chem. Int. Ed.</i> 2021, 60, 4849. |
| <b>AIOC-57</b>              | 8500       | <i>Chem. Commun.</i> 2021,57,12820.          |
| <b>AIOC-76</b>              | 0.61       | <i>Angew. Chem. Int. Ed.</i> 2022, 61,       |
| <b>AIOC-90</b>              | 13.5       | 202116563.                                   |
| <b>AIOC-91</b>              | 21.2       | <i>Aggregate</i> 2022, e264.                 |
| <b>AIOC-92</b>              | 7.5        | <i>Aggregate</i> 2022, e264.                 |
| <b>AIOC-93</b>              | 71.8       | <i>Aggregate</i> 2022, e264.                 |
| <b>AIOC-94</b>              | 41.2       | <i>Aggregate</i> 2022, e264.                 |
| <b>AIOC-95</b>              | 48.5       | <i>Aggregate</i> 2022, e264.                 |
| <b>PTC-273</b>              | 11700      | <i>Aggregate</i> 2022, e264.                 |
| <b>PTC-274</b>              | 2410       | <i>J. Am. Chem. Soc.</i> 2022, 144, 8153.    |
| <b>PTC-296</b>              | -160       | <i>J. Am. Chem. Soc.</i> 2022, 144, 8153.    |
| <b>AgSn<sub>12</sub></b>    | 2550       | <i>Inorg. Chem. Front.</i> 2022, 9, 1984.    |
| <b>Cu<sub>8</sub></b>       | 350        | <i>Angew. Chem. Int. Ed.</i> 2022, 61,       |
| <b>Cage-1</b>               | 7.5        | 202202853.                                   |
| <b>Cage-2</b>               | 3.2        | <i>Chem. Eur. J.</i> 2018, 24, 19317.        |
| <b>Cage-3</b>               | 3.4        | <i>J. Am. Chem. Soc.</i> 2020, 142, 13356.   |
| <b>ZnTPyP-1(Zn/Zn)/PDMS</b> | 1350       | <i>J. Am. Chem. Soc.</i> 2020, 142, 13356.   |
| <b>ZnTPyP-2/PDMS</b>        | 400        | <i>J. Am. Chem. Soc.</i> 2020, 142, 13356.   |
| <b>TPyP(Zn)/PDMS</b>        | 200        | <i>J. Am. Chem. Soc.</i> , 2021, 143, 17162– |
| <b>TPyP(Mn)/PDMS</b>        | 160        | 17169.                                       |
|                             |            | <i>J. Am. Chem. Soc.</i> , 2021, 143, 17162– |
|                             |            | 17169.                                       |
|                             |            | <i>J. Am. Chem. Soc.</i> , 2021, 143, 17162– |
|                             |            | 17169.                                       |
|                             |            | <i>J. Am. Chem. Soc.</i> , 2021, 143, 17162– |
|                             |            | 17169.                                       |

---
